# Supplementary material for: Model selection reveals selective regulation of blood amino acid and lipid metabolism by insulin in humans
Source: PubMed Central journal article supplement — iScience. 2024 May 16;27(6):109833. doi: 10.1016/j.isci.2024.109833 (PMC11270033; doi:10.1016/j.isci.2024.109833), 2024-05-16
Supplement: mmc1.pdf [file mmc1.pdf]

**iScience, Volume 27**

**Supplemental information**

**Model selection reveals selective regulation  
of blood amino acid and lipid metabolism  
by insulin in humans**

**Suguru Fujita, Ken-ichi Hironaka, Yasuaki Karasawa, and Shinya Kuroda**

**Supplementary Figures**

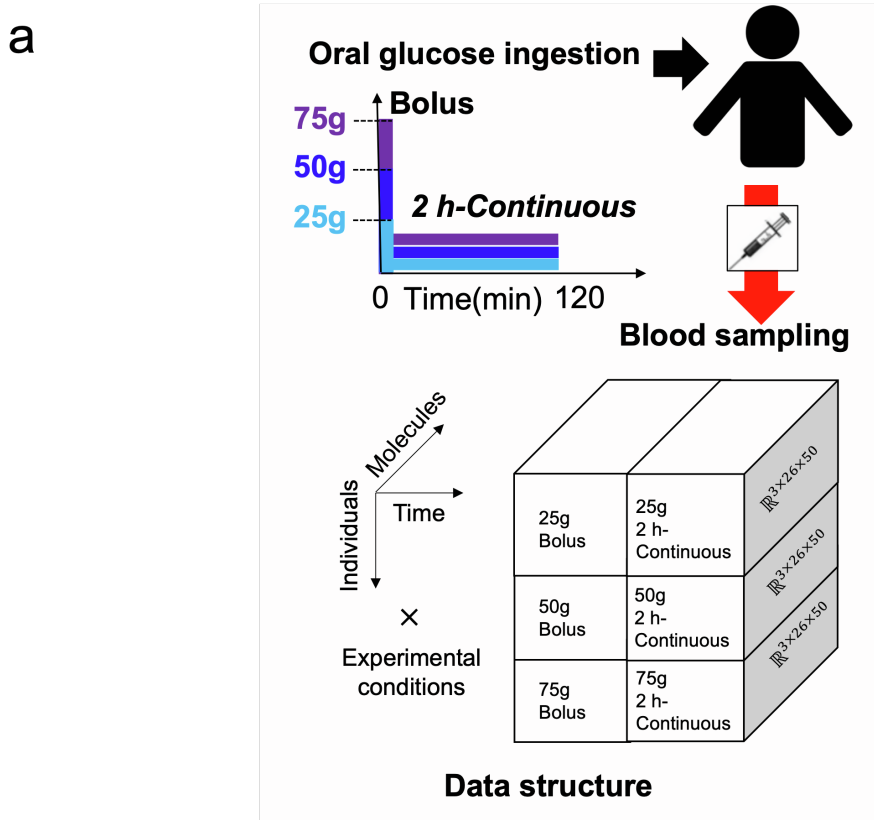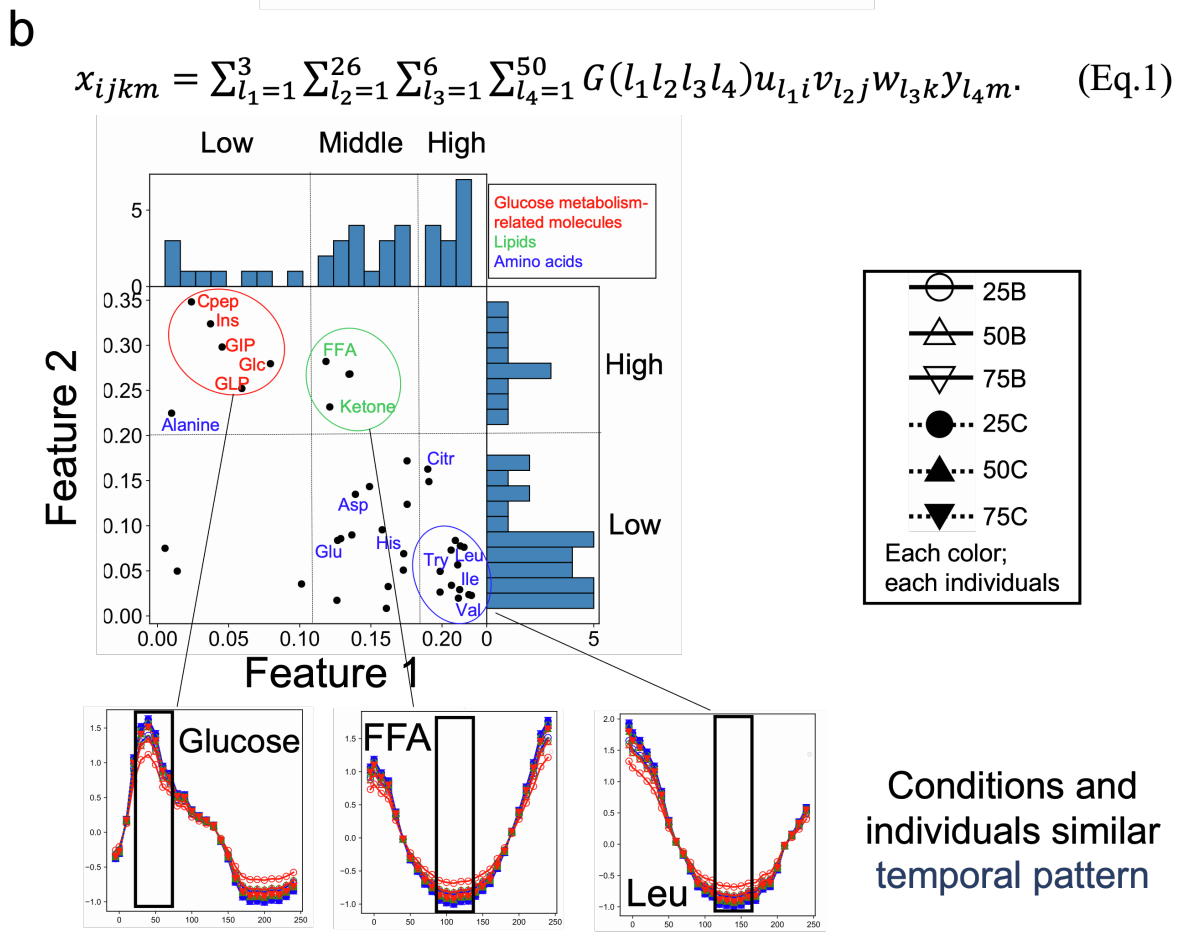

Figure. S1 Data set for model construction. Related to Figure 1.

**a** The experimental dataset for model selection. Three individuals orally ingested glucose with three doses 75, 50, and 25 g in two durations of bolus and 2 h continuous ingestion. The data structure has four axes: individual  $\times$  time  $\times$  experimental condition  $\times$  molecule. The data represent the concentration changes at 26 time points (-5, 0, 10, 20, 30, 40, 50, 60, 70, 80, 90, 100, 110, 120, 130, 140, 150, 160, 170, 180, 190, 200, 210, 220, 230, 240 minutes) from 5 min before fasting to 240 min after glucose ingestion for 50 molecules in three healthy subjects, in six different experimental conditions.

**b** Distribution of features extracted by tensor decomposition. Time series indicate similar temporal patterns among experimental conditions ('Conditions similar') and among individuals ('Individuals similar') for representative molecules<sup>28</sup>. The dashed lines show the values of Feature 1 divided into three, and Feature 2 divided into two, based on the shape of the distribution. The black lines in the time series indicate the time point of the peak. See our previous study for more details<sup>28</sup>. The color of each line indicates each condition. Solid lines indicate bolus ingestion, and dashed lines indicate 2 h continuous ingestion. Circles, triangles, and lower triangles indicate the three doses, 25, 50, and 75 g, respectively. Abbreviations for the representative molecules are as follows: Asp aspartic acid; Cit, citrulline; CRP, C-reactive peptide; FFA, free fatty acid; 3-OH, 3-hydroxybutyric acid; Ketone, Total ketone body; GIP, gastric inhibitory polypeptide (active); Glc, glucose; GLP, glucagon-like peptide-1; Glu,

glutamic acid; His, histidine; Ile, isoleucine; Ins, insulin; Leu, leucine; Tyr, tyrosine; Val, valine.

The label colors correspond to the metabolic group list (inset).

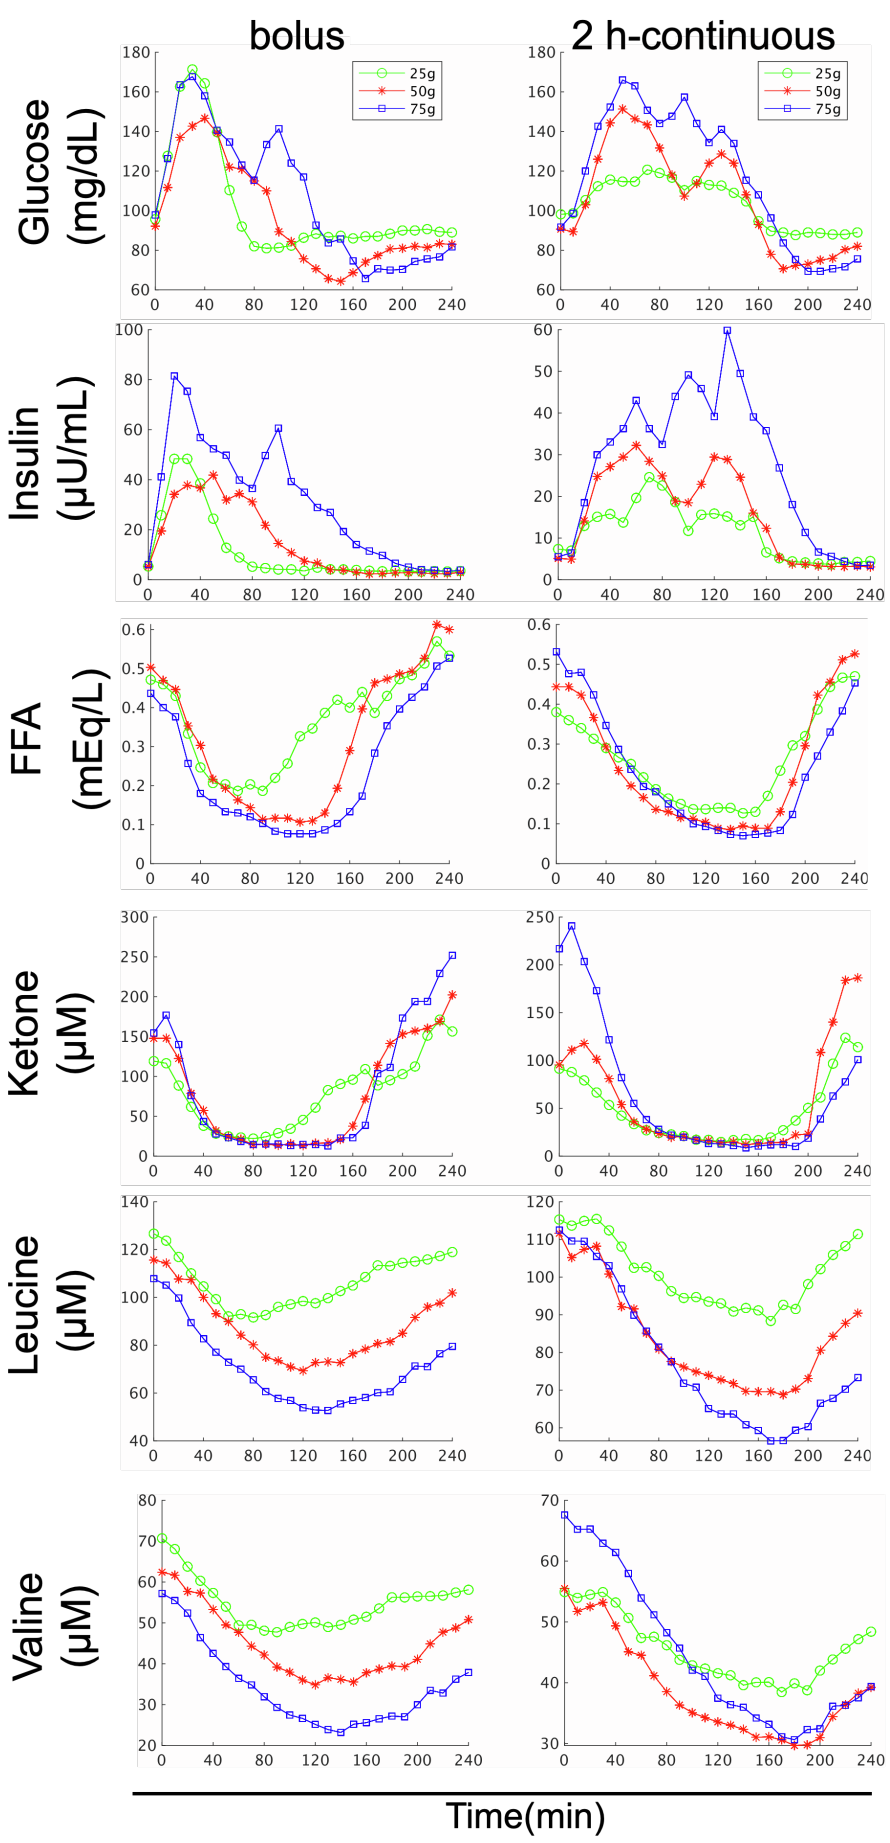

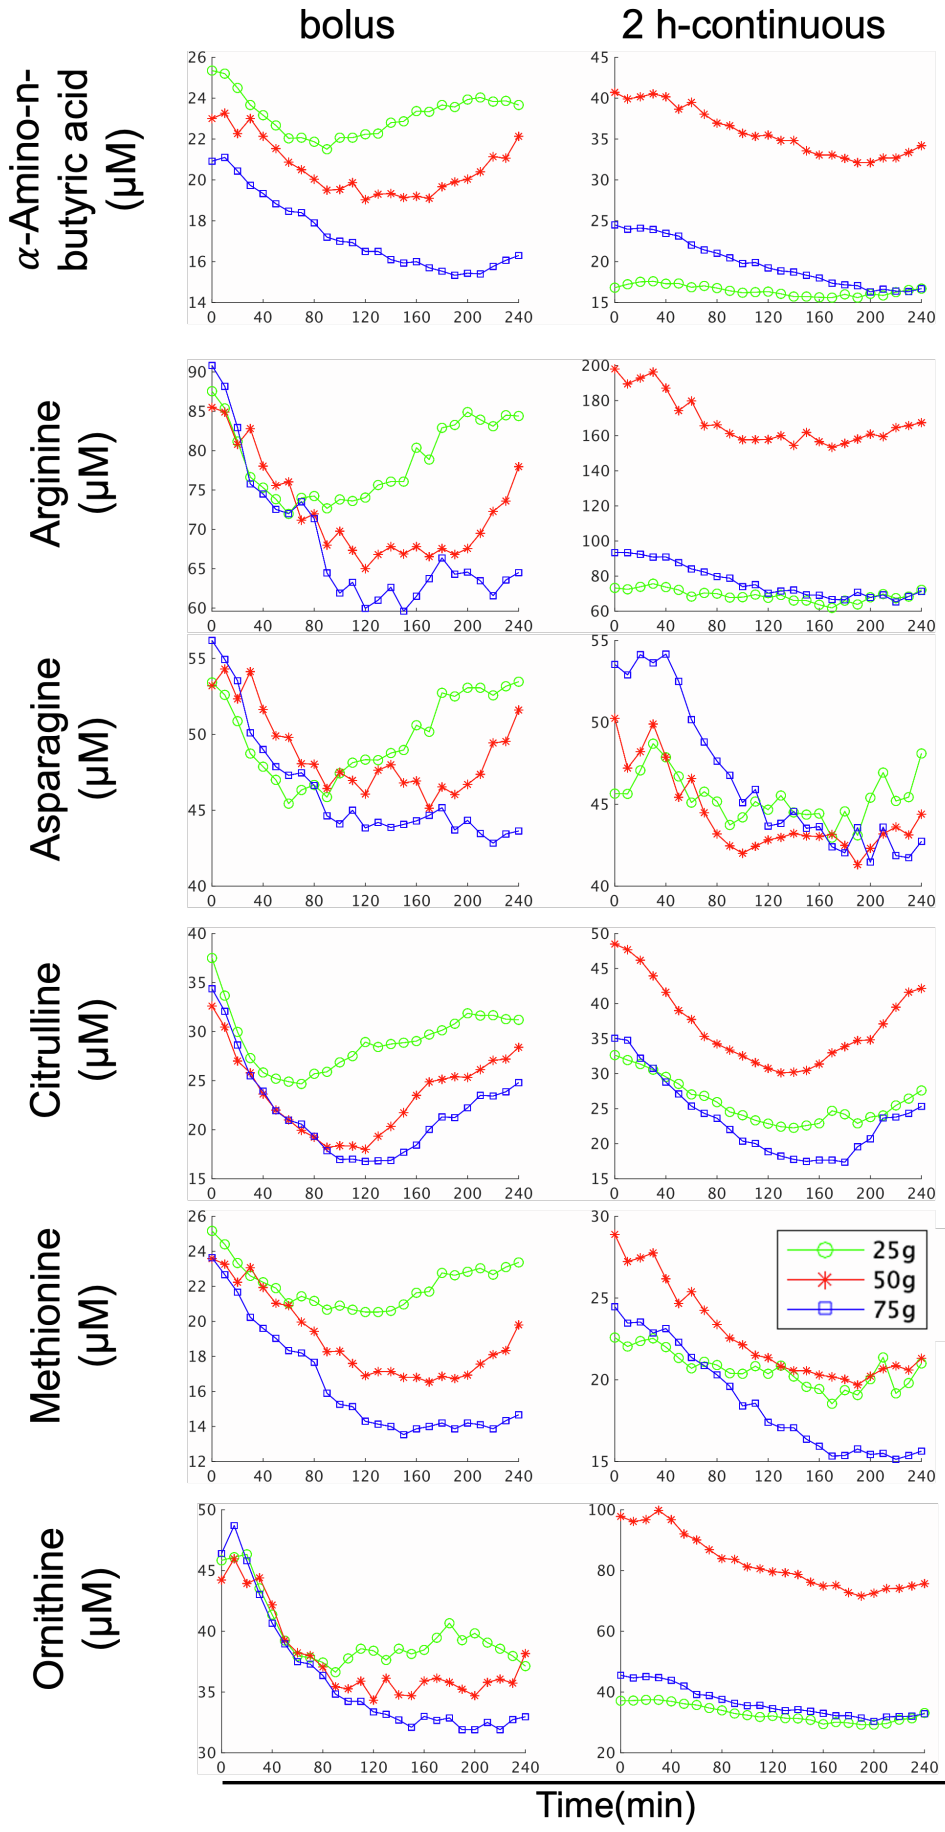

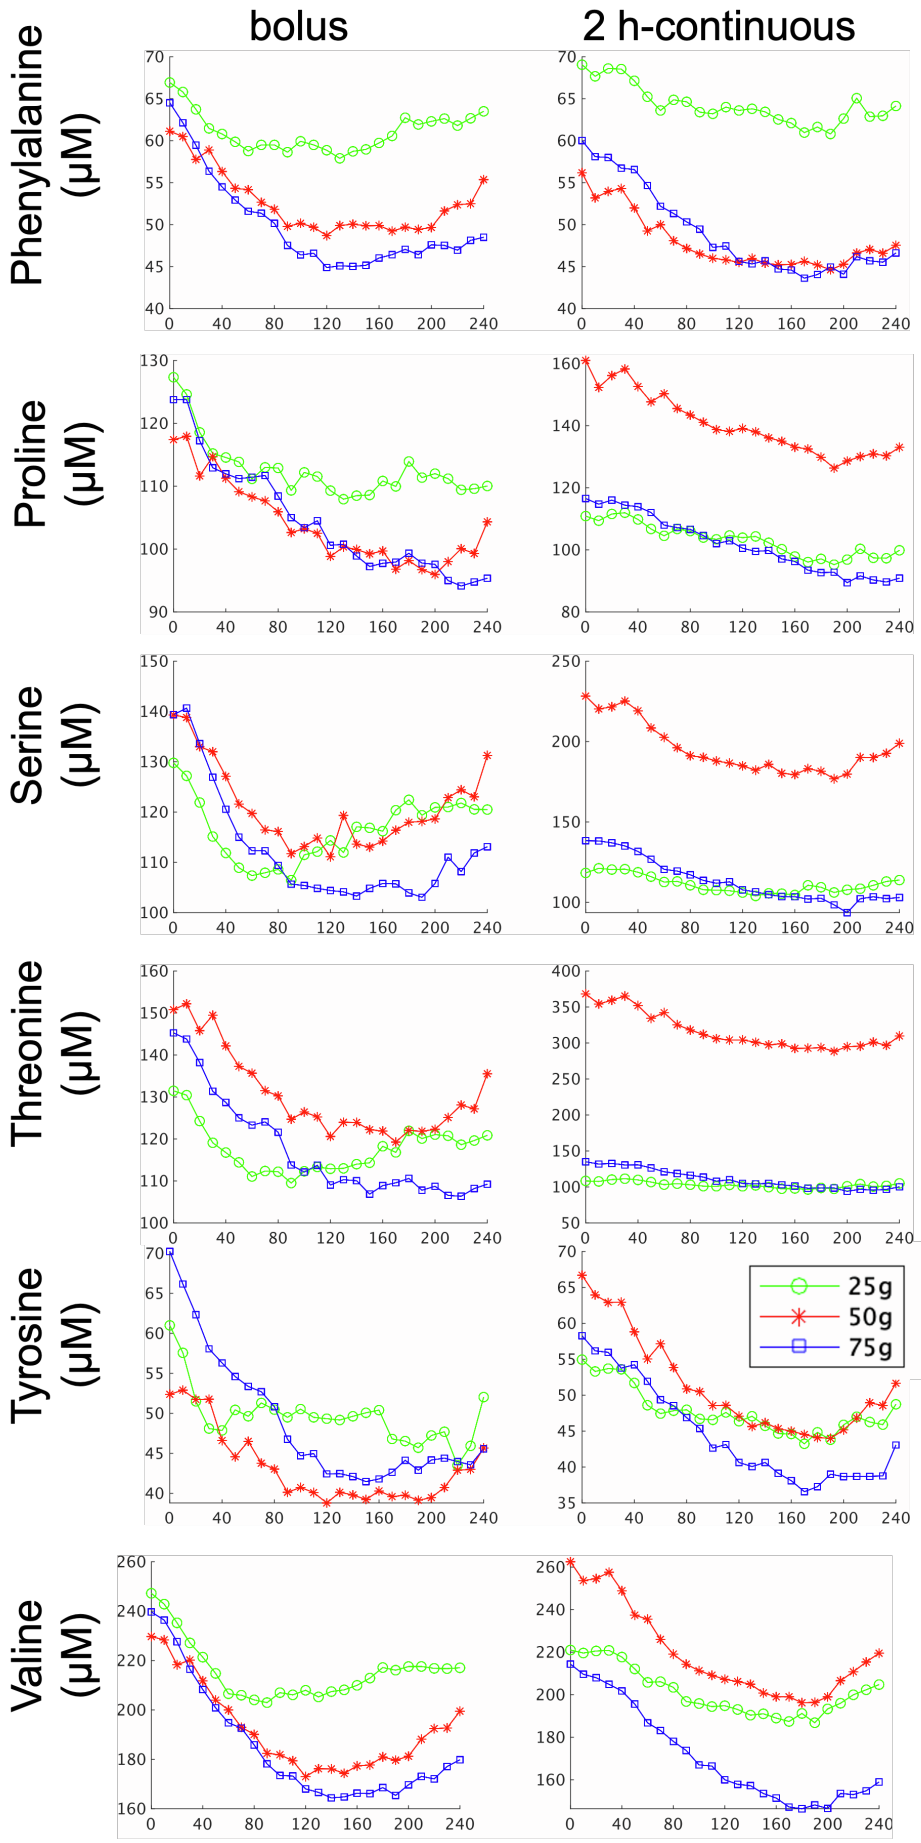



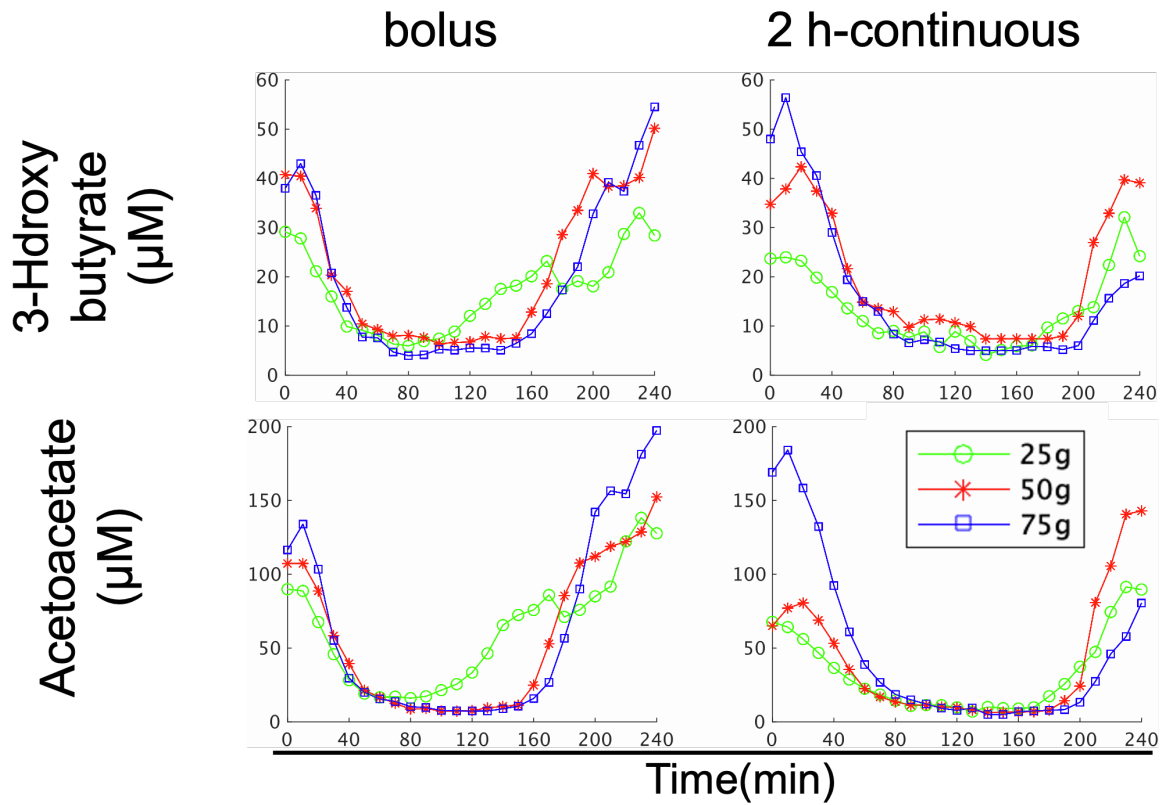

**Figure. S2 Time course data of blood insulin and blood metabolites in three individuals by glucose ingestion. Related to Figure 1.**

The dose and ingestion pattern are indicated at the top. Green, red, and blue indicate three different doses: 25 g, 50 g, and 75 g, respectively.

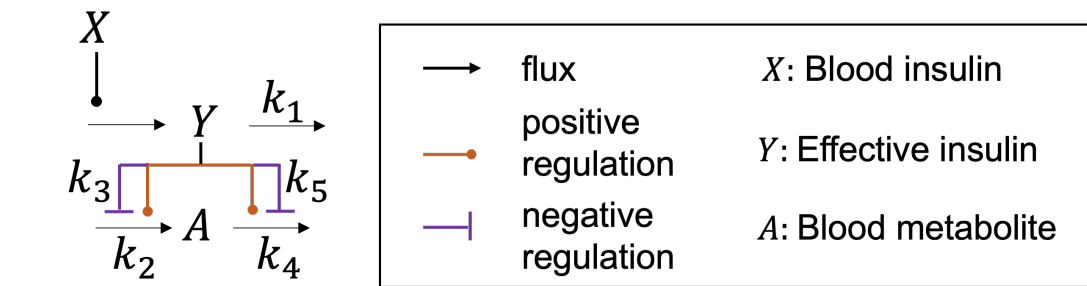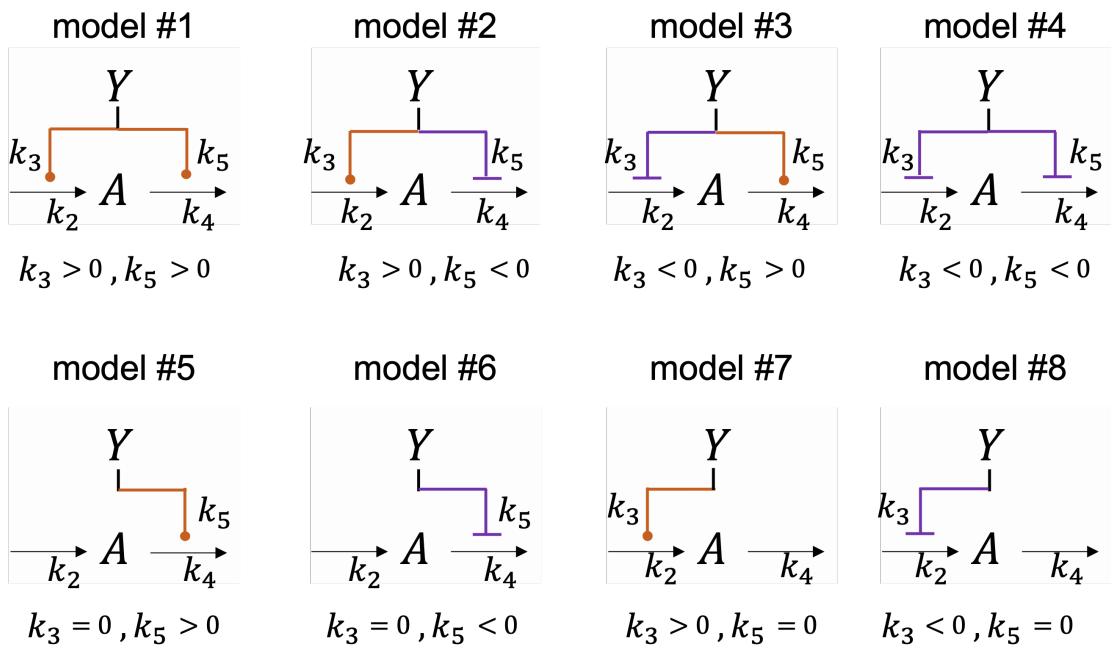

Figure. S3 Model diagram. Related to Figure 1.

FigS5

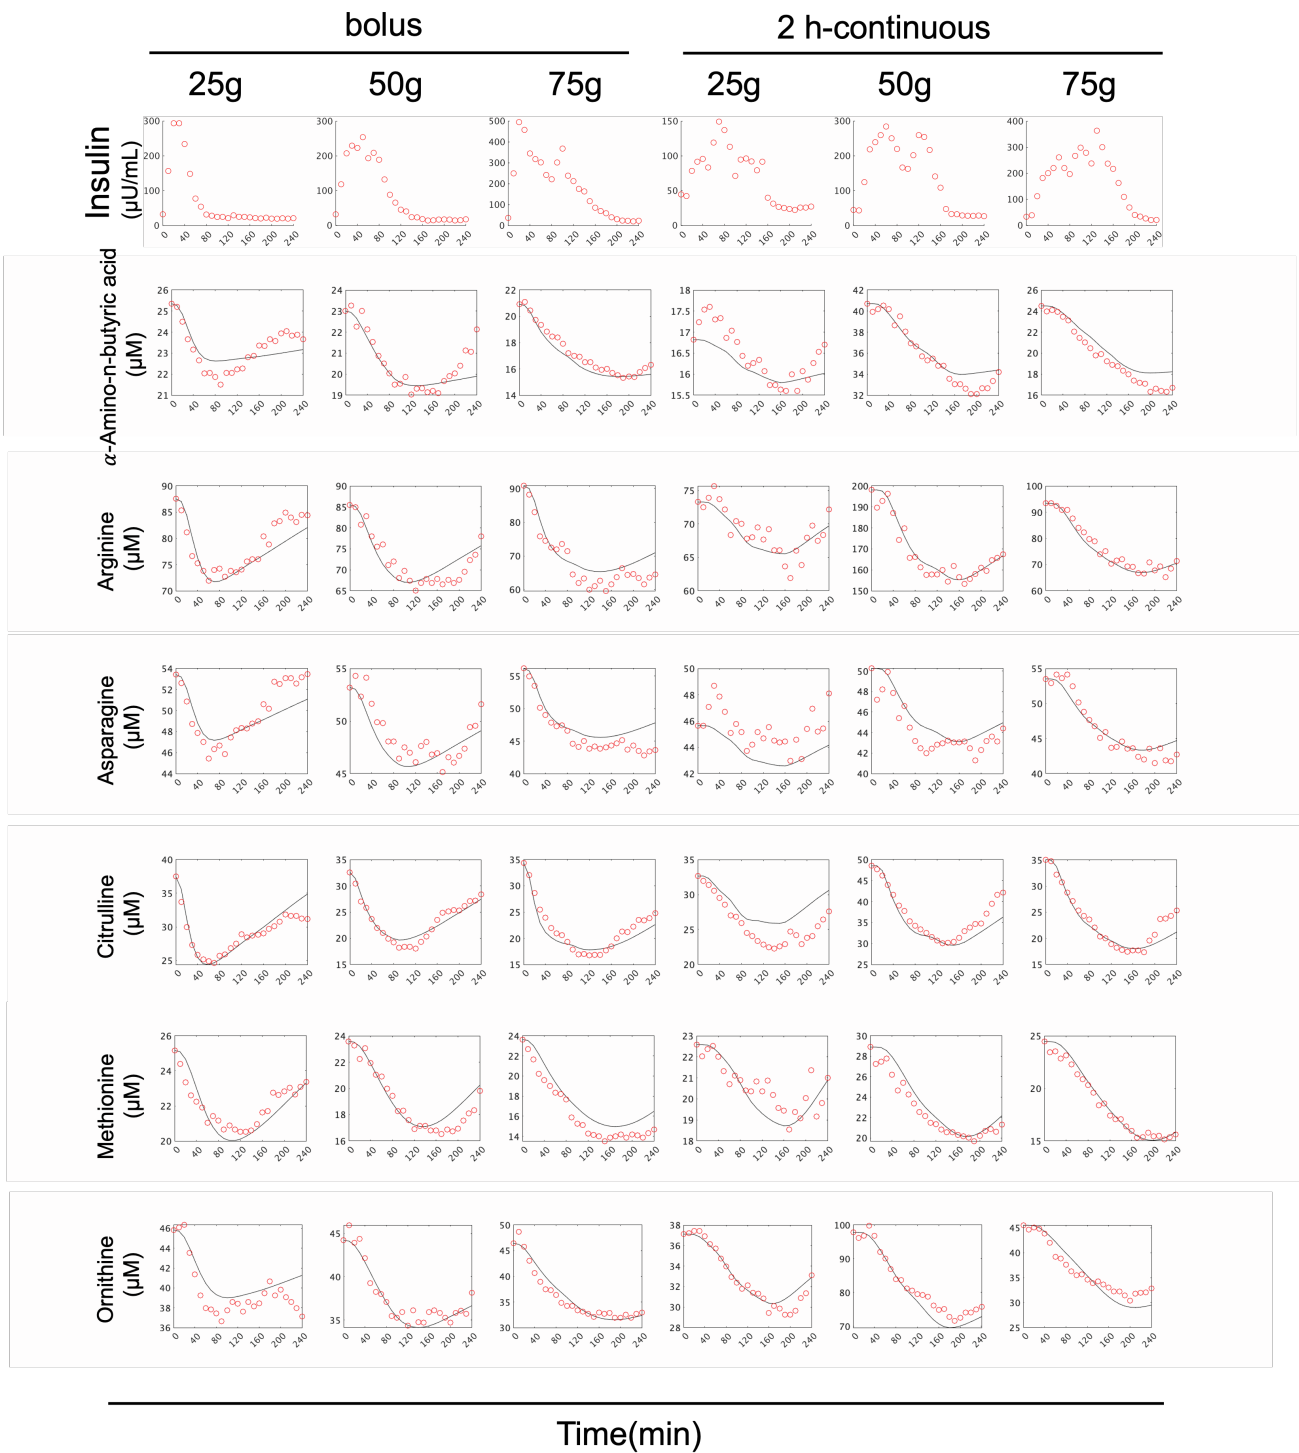

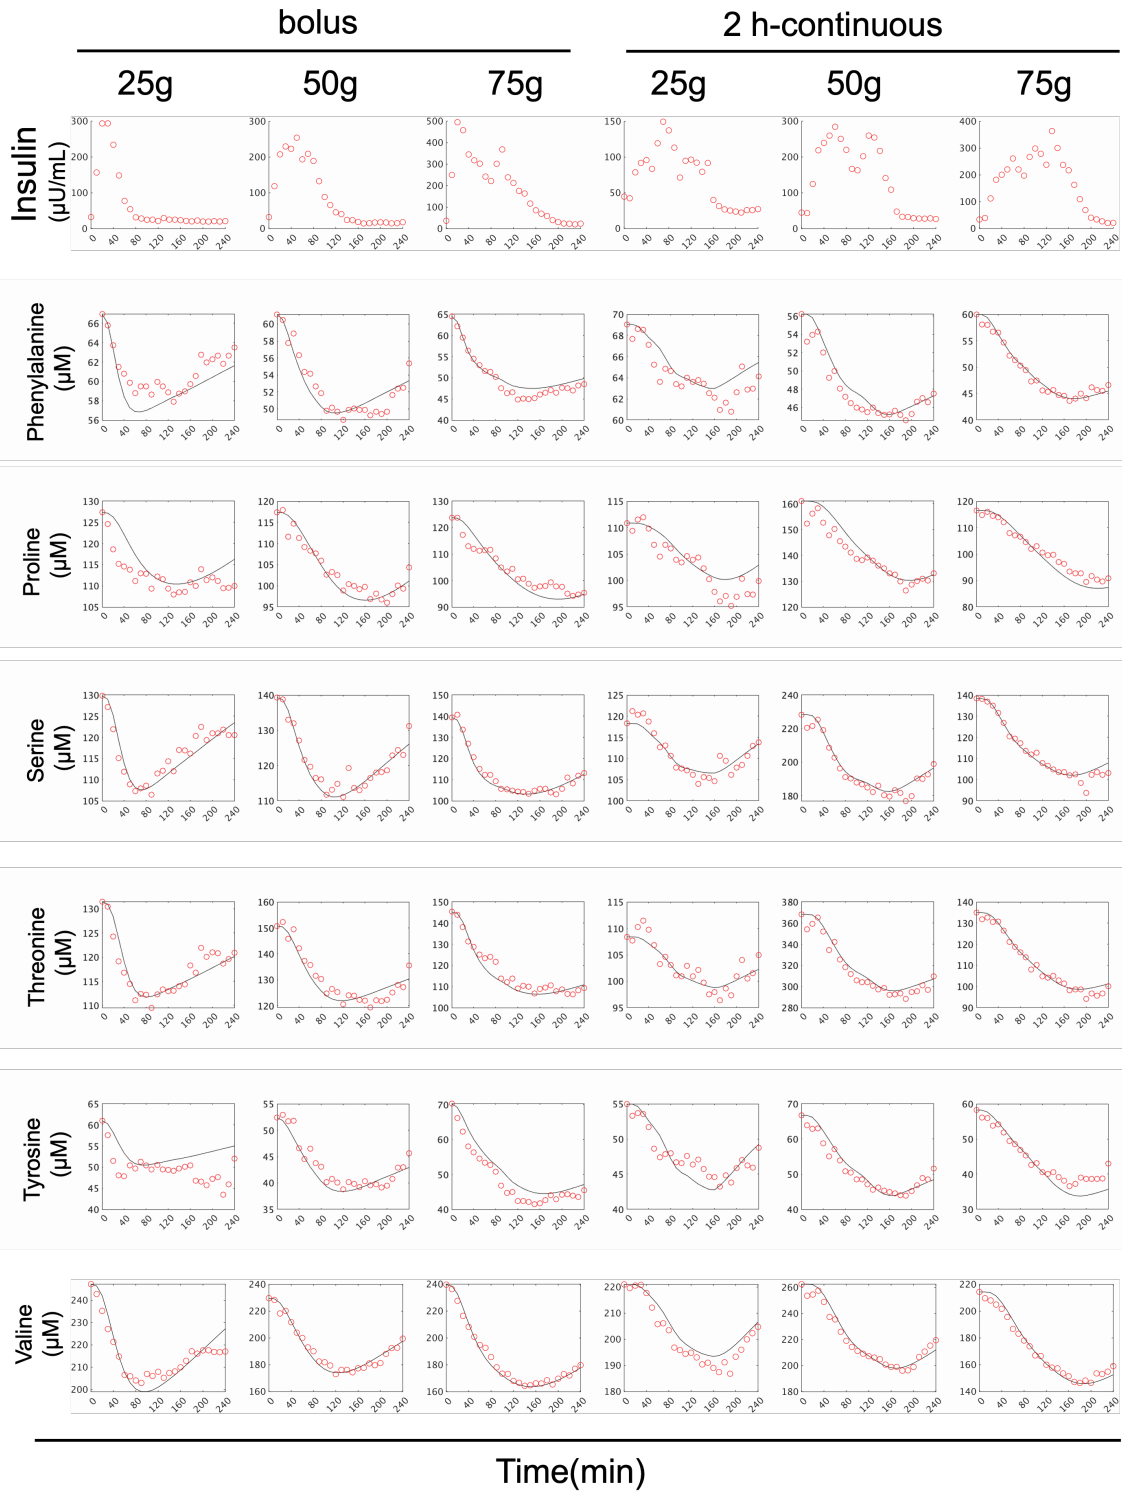

Time(min)

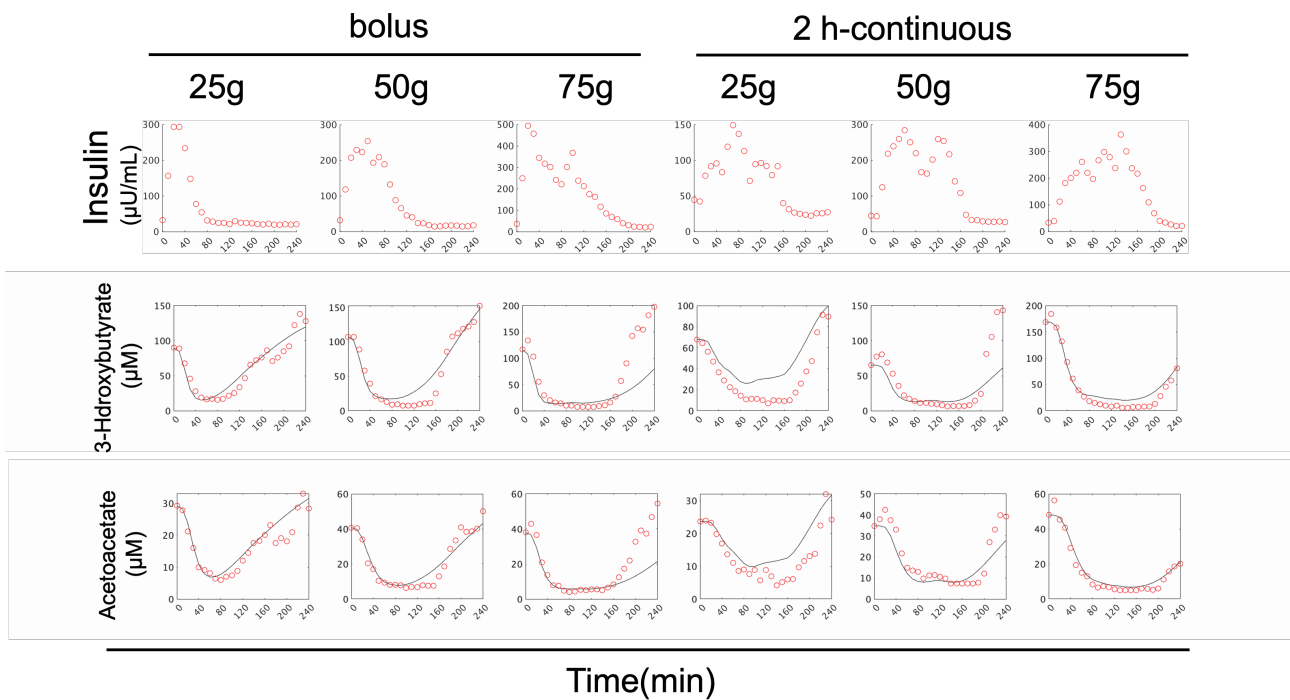

**Figure. S4 Time course data on the mean values of blood insulin and blood metabolites in three individuals by glucose ingestion. Related to Figure 1.**

The doses and ingestion patterns are indicated at the top. The black lines indicate the temporal patterns of simulations, and the red circles indicate the time course data of experiments. The temporal patterns of the simulations were calculated using the best fit model.

Previous knowledge

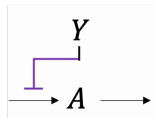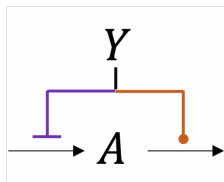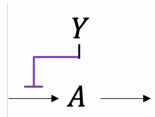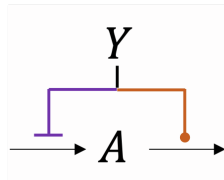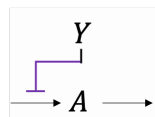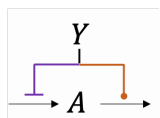

| Metabolites                    | Model #  |
|--------------------------------|----------|
| Ornithine *1                   | Model #1 |
| Tyrosine *1                    | Model #1 |
| 3-Hydroxybutyrate *2,3         | Model #3 |
| Free fatty acid *4,5,6         | Model #3 |
| Acetoacetic acid *2,3          | Model #3 |
| Total ketone body *2,3         | Model #3 |
| Arginine *1                    | Model #4 |
| Proline                        | Model #4 |
| Isoleucine *1,7                | Model #5 |
| Leucine *1,7                   | Model #5 |
| Phenylalanine *1,7             | Model #5 |
| Valine *1,7                    | Model #5 |
| $\alpha$ -Amino-n-butyric acid | Model #5 |
| Asparagine                     | Model #8 |
| Citrulline *1                  | Model #8 |
| Methionine *1                  | Model #8 |
| Serine                         | Model #8 |
| Threonine *8                   | Model #8 |

This study

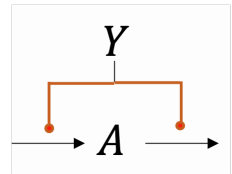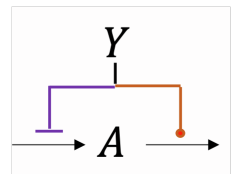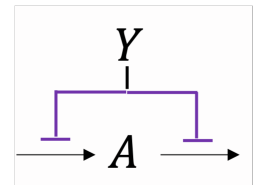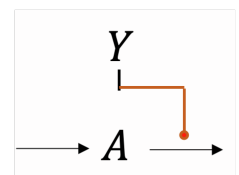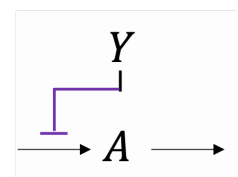

**Figure. S5 The model structures of of previous knowledge and the selected model of this study. Related to Figure 2.**

Metabolites, numbers of selected models, model structures selected for this study and the regulatory structure of previous knowledge \*1<sup>4</sup>, \*2<sup>23</sup>, \*3<sup>26</sup>, \*4<sup>40</sup>, \*5<sup>41</sup>, \*6<sup>5</sup>, \*7<sup>3</sup>, \*8<sup>19</sup>.

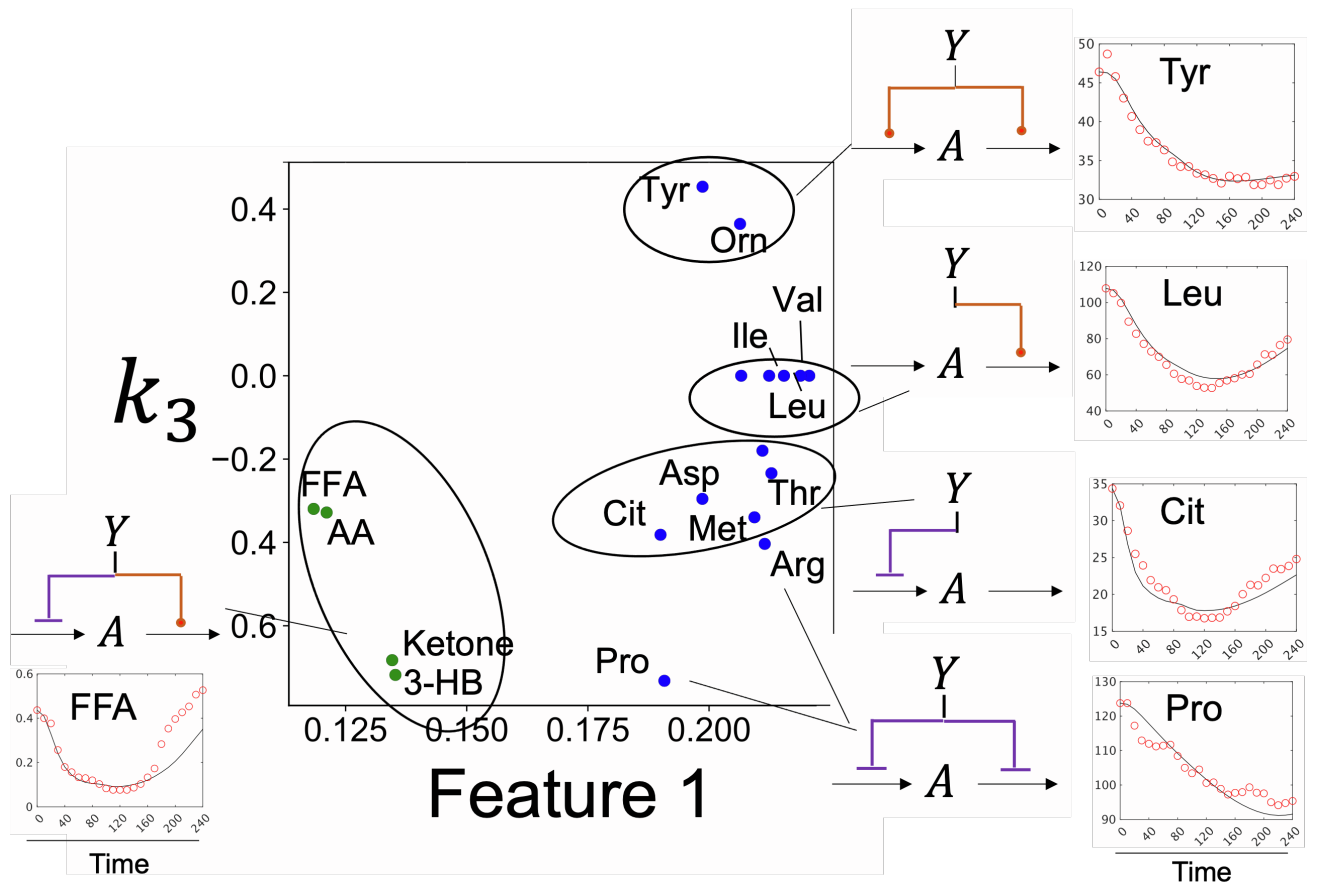



**Figure. S6 The features extracted by tensor decomposition. Related to Figure 3.**

**a** Distribution of model parameters and Feature 1 (Fig. 3b). Circles and lines represent metabolites for which the same model structure was selected (Fig. 2). Time series of experimental and simulated values for a representative molecule for each selected model are shown (75 g bolus).

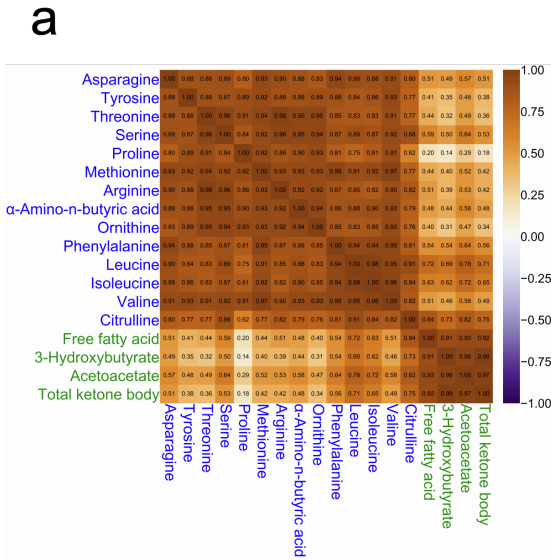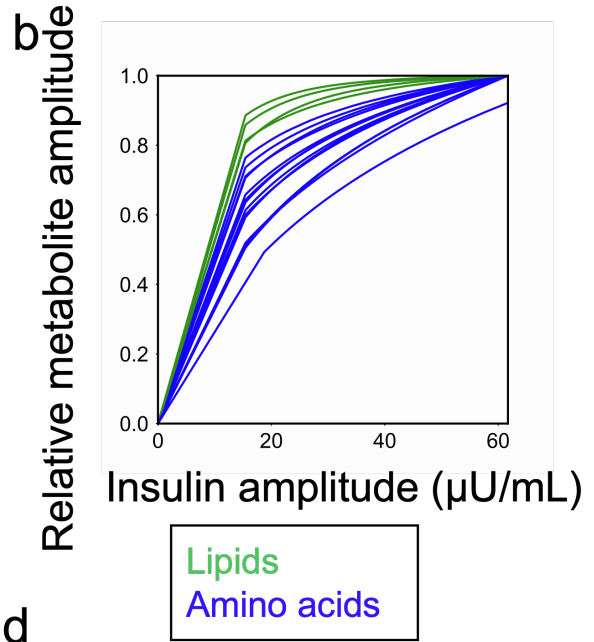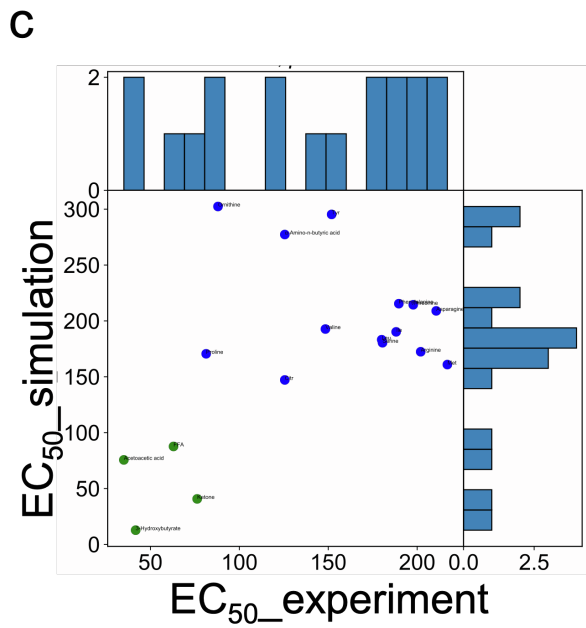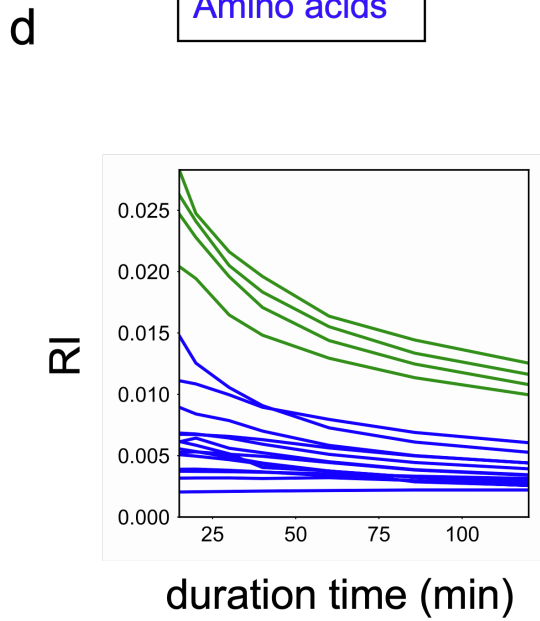

**Figure. S7 The regulation of the amplitude of amino acids and lipids by amplitude of insulin.**

**Related to Figure 4.**

**a** Heat map showing the temporal pattern similarity among metabolites among all metabolites(see Methods). The color of the letters indicates metabolic group (blue: amino acids, green: lipids)

**b** The peaks of all metabolite against the amplitude concentration of insulin in the simulation. The color of the line indicates the metabolic group.

**c** Distributions of experimental  $EC_{50}$  value and simulated  $EC_{50}$  value of metabolite. As with the simulated  $EC_{50}$  value, nonlinear fitting was performed to calculate the experimental  $EC_{50}$  value using the maximum value of insulin in the time series and the  $\log_2$  Fold change relative to the metabolite fasting value.

**d** RTs for the metabolite against the duration time(inverse of rate of response) of insulin.

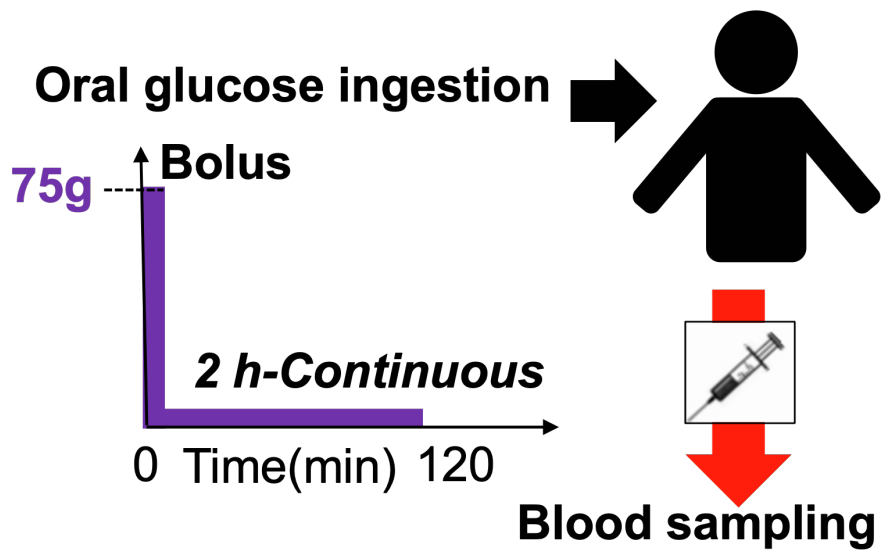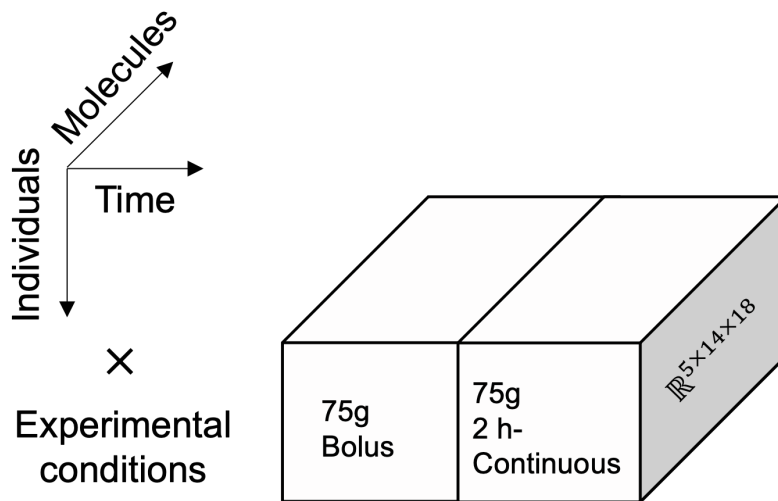

**Data structure**

**Figure. S8 Data set for model validation. Related to Figure 6.**

Experimental dataset for validation. Five individuals orally ingested glucose with three doses 75g in two durations of bolus and 2 h continuous ingestion. The data structure has four axes: individual  $\times$  time  $\times$  experimental condition  $\times$  molecule. The data represent the concentration changes at 14 time points (-5, 0, 10, 20, 30, 45, 60, 75, 90, 120, 150, 180, 210, 240 minutes) from 5 min before fasting to 240 min after glucose ingestion for 20 molecules in five healthy subjects, in two different experimental conditions.

bolus 75g    2 h-continuous 75g

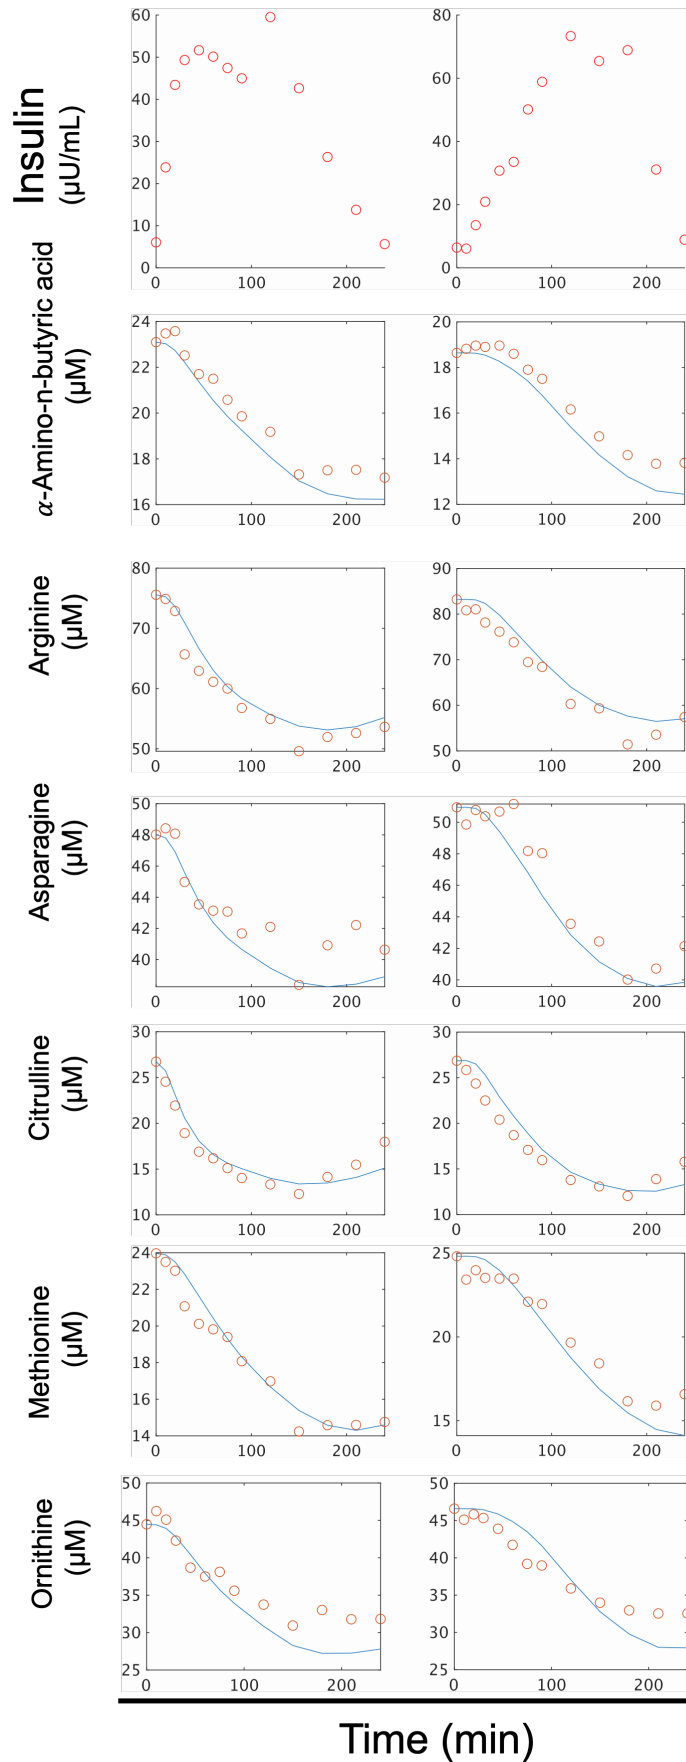

bolus 75g    2 h-continuous 75g

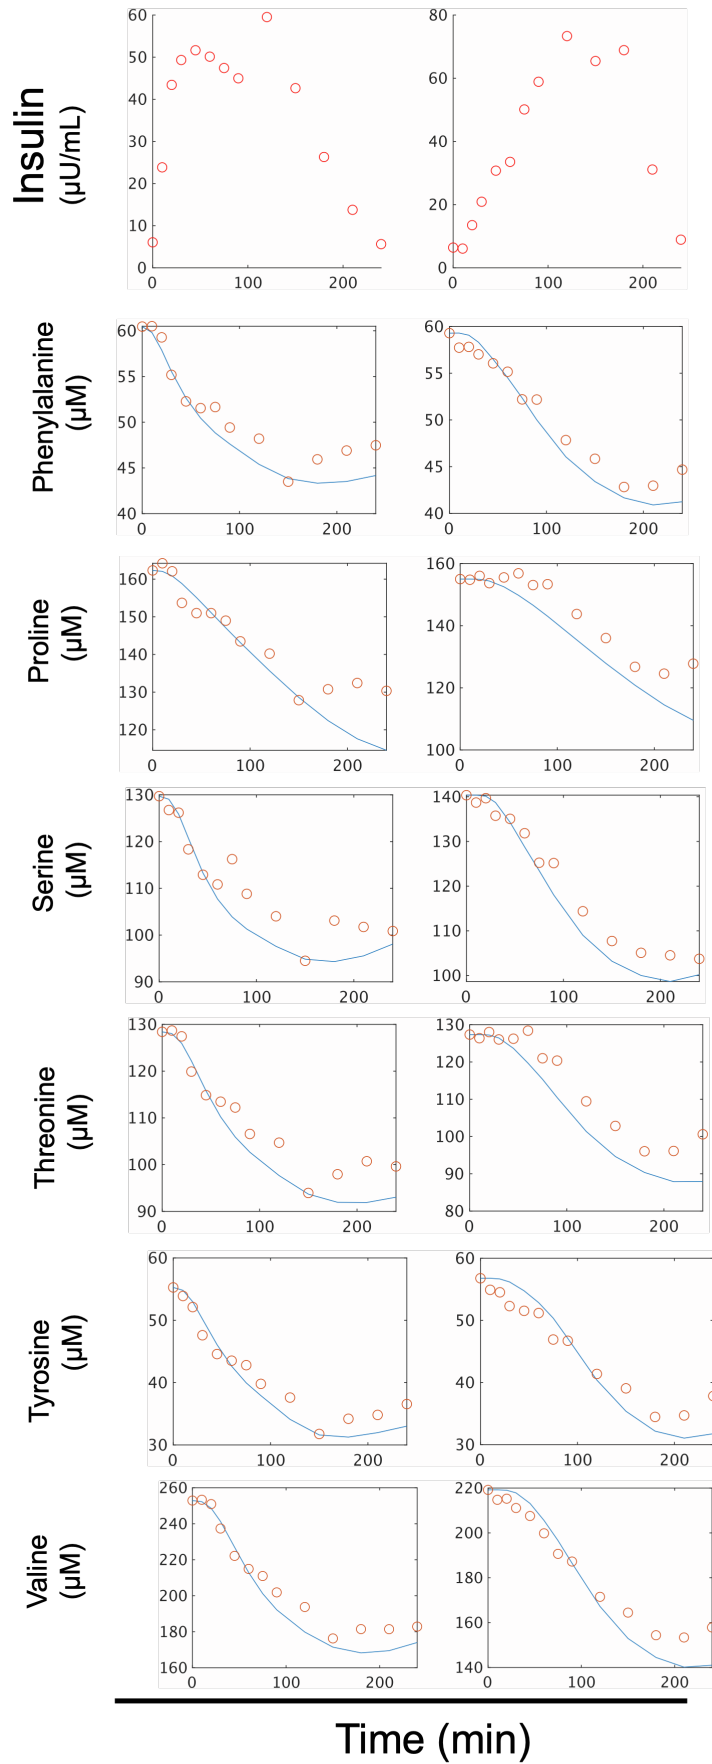

bolus 75g    2 h-continuous 75g

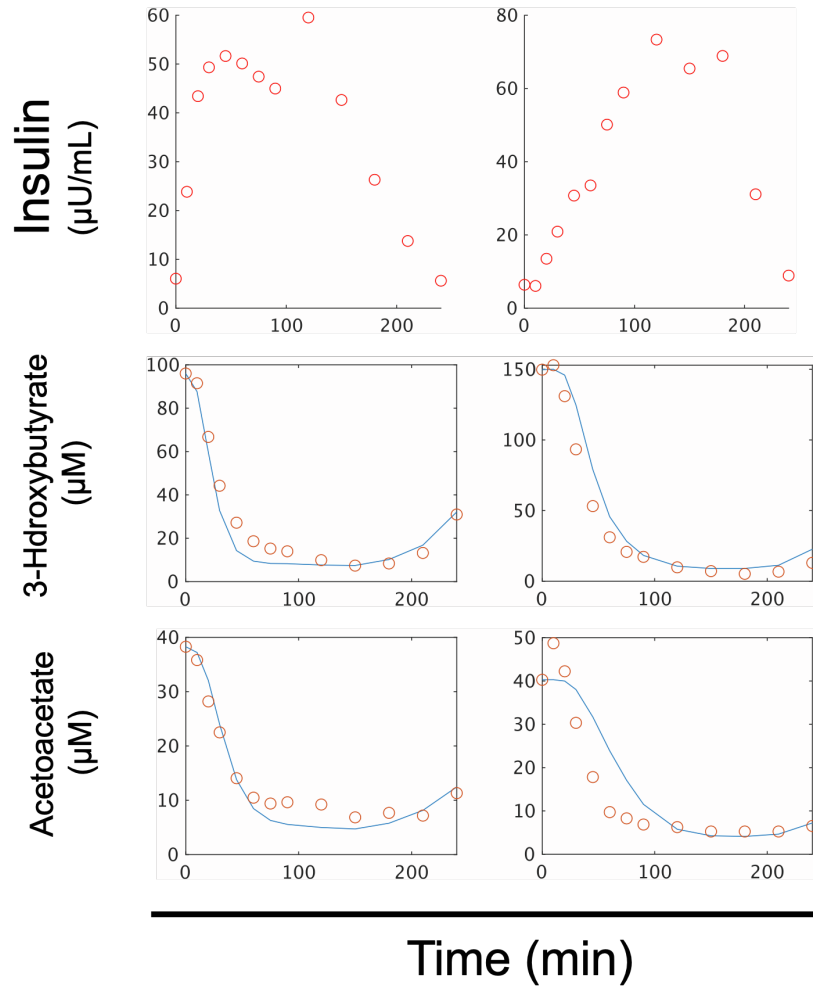



**Figure. S9 Time course data on the mean values of blood insulin and blood metabolites in five individuals by glucose ingestion for model validation. Related to Figure 6.**

The dose and ingestion pattern are indicated at the top. The blue lines indicate the temporal patterns of simulations, and the red circles indicate the time course data of experiments.

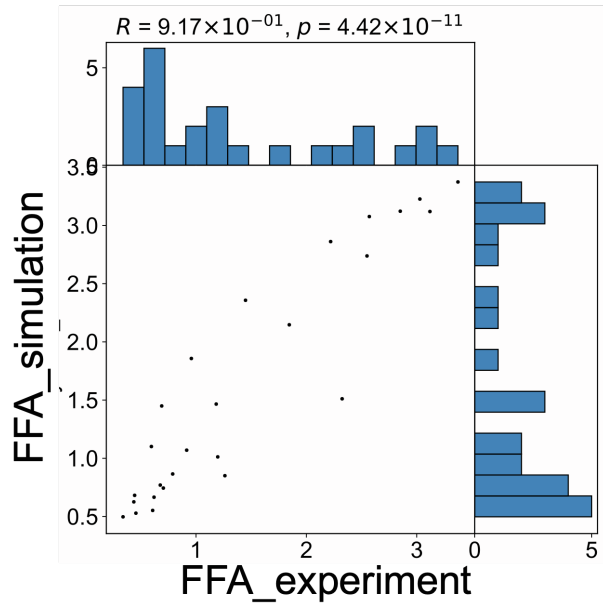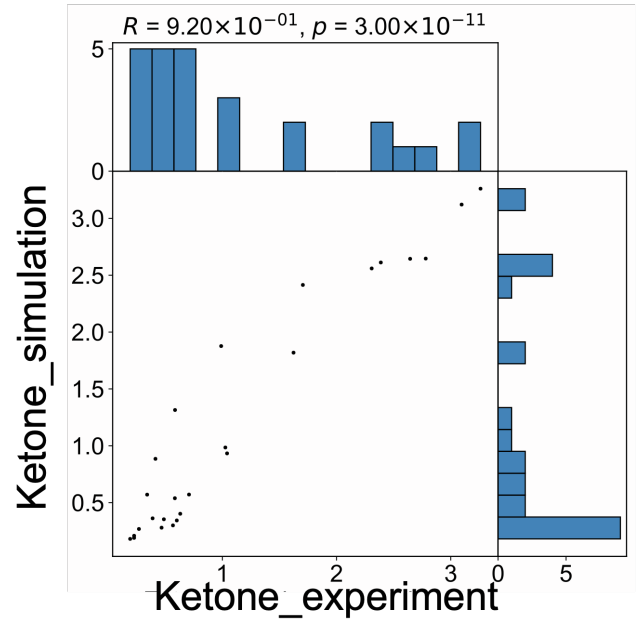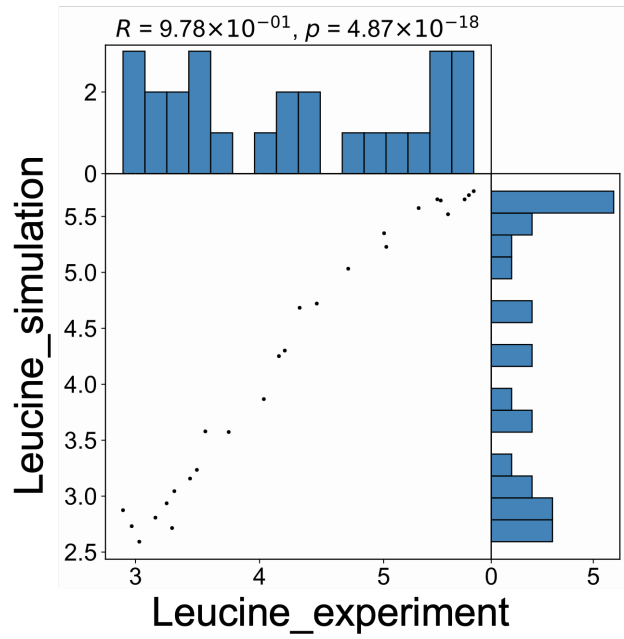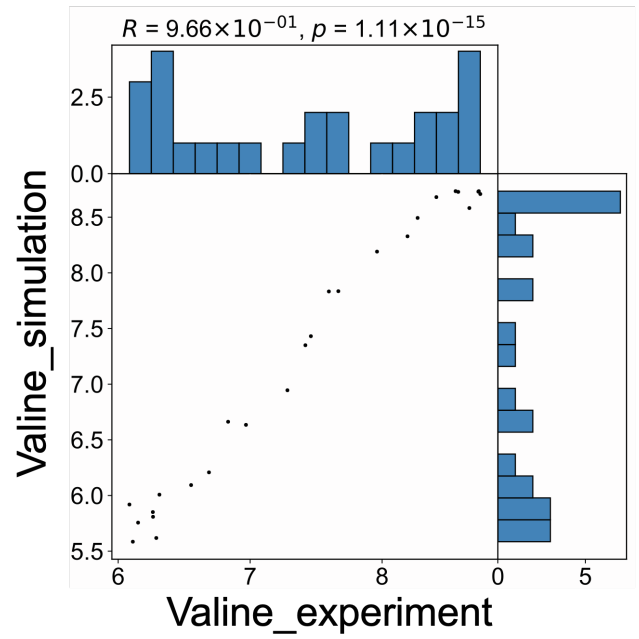

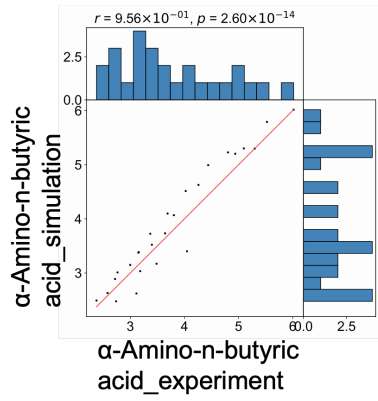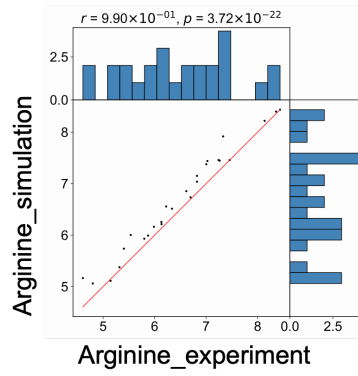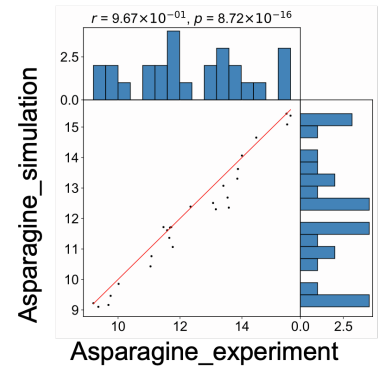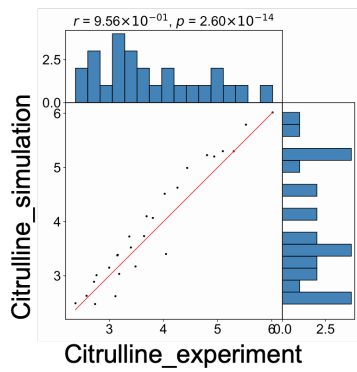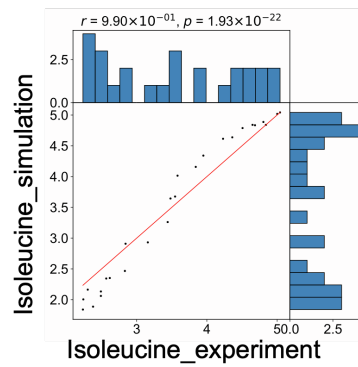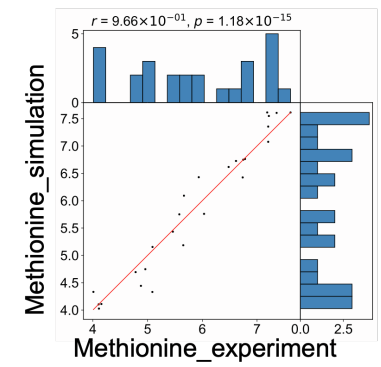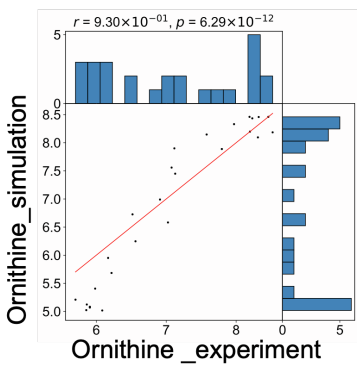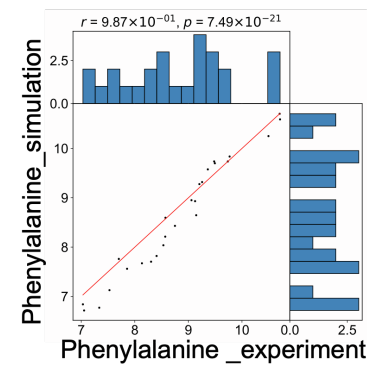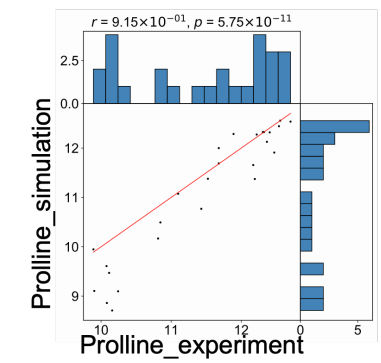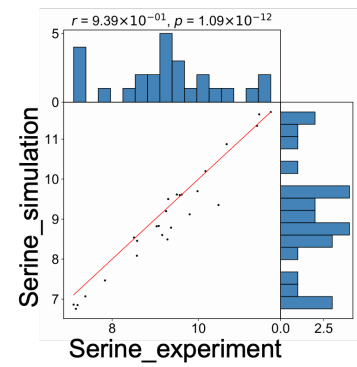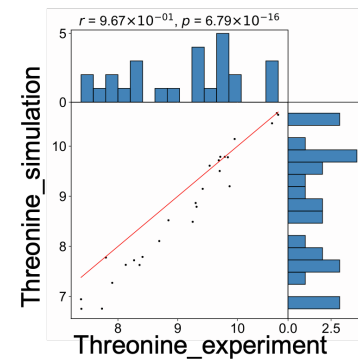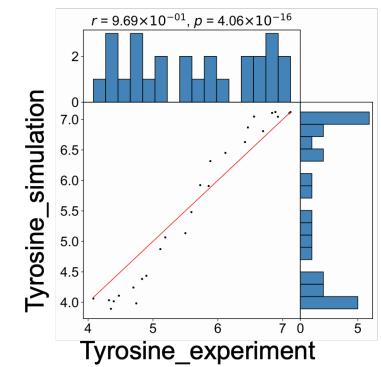

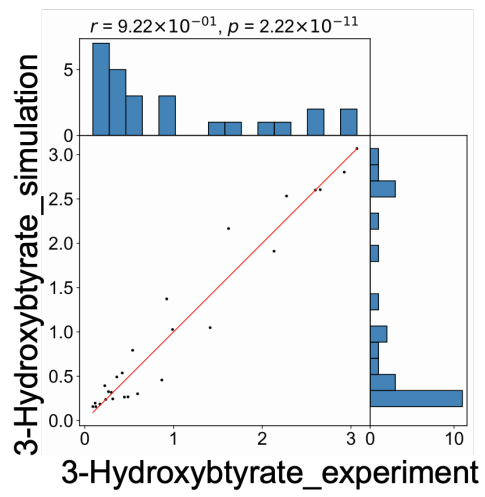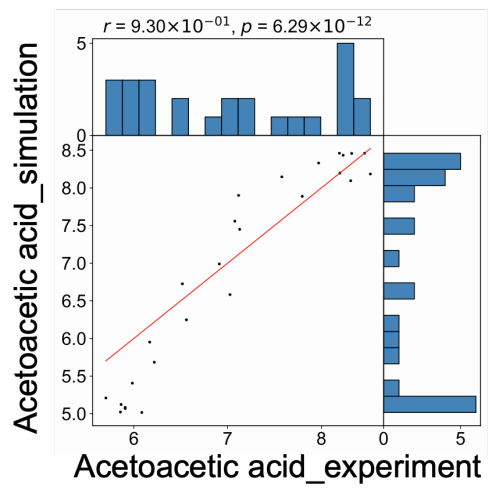

**Figure. S10 Distributions of experimental value and simulated value of metabolite. Related to Figure 6.**

In the upper right,  $r$  and  $p$  indicate the correlation coefficient and  $p$  value, respectively. The red line indicates  $y=x$ . Experimental and simulated values are shown normalized by the standard deviation for each experimental condition.

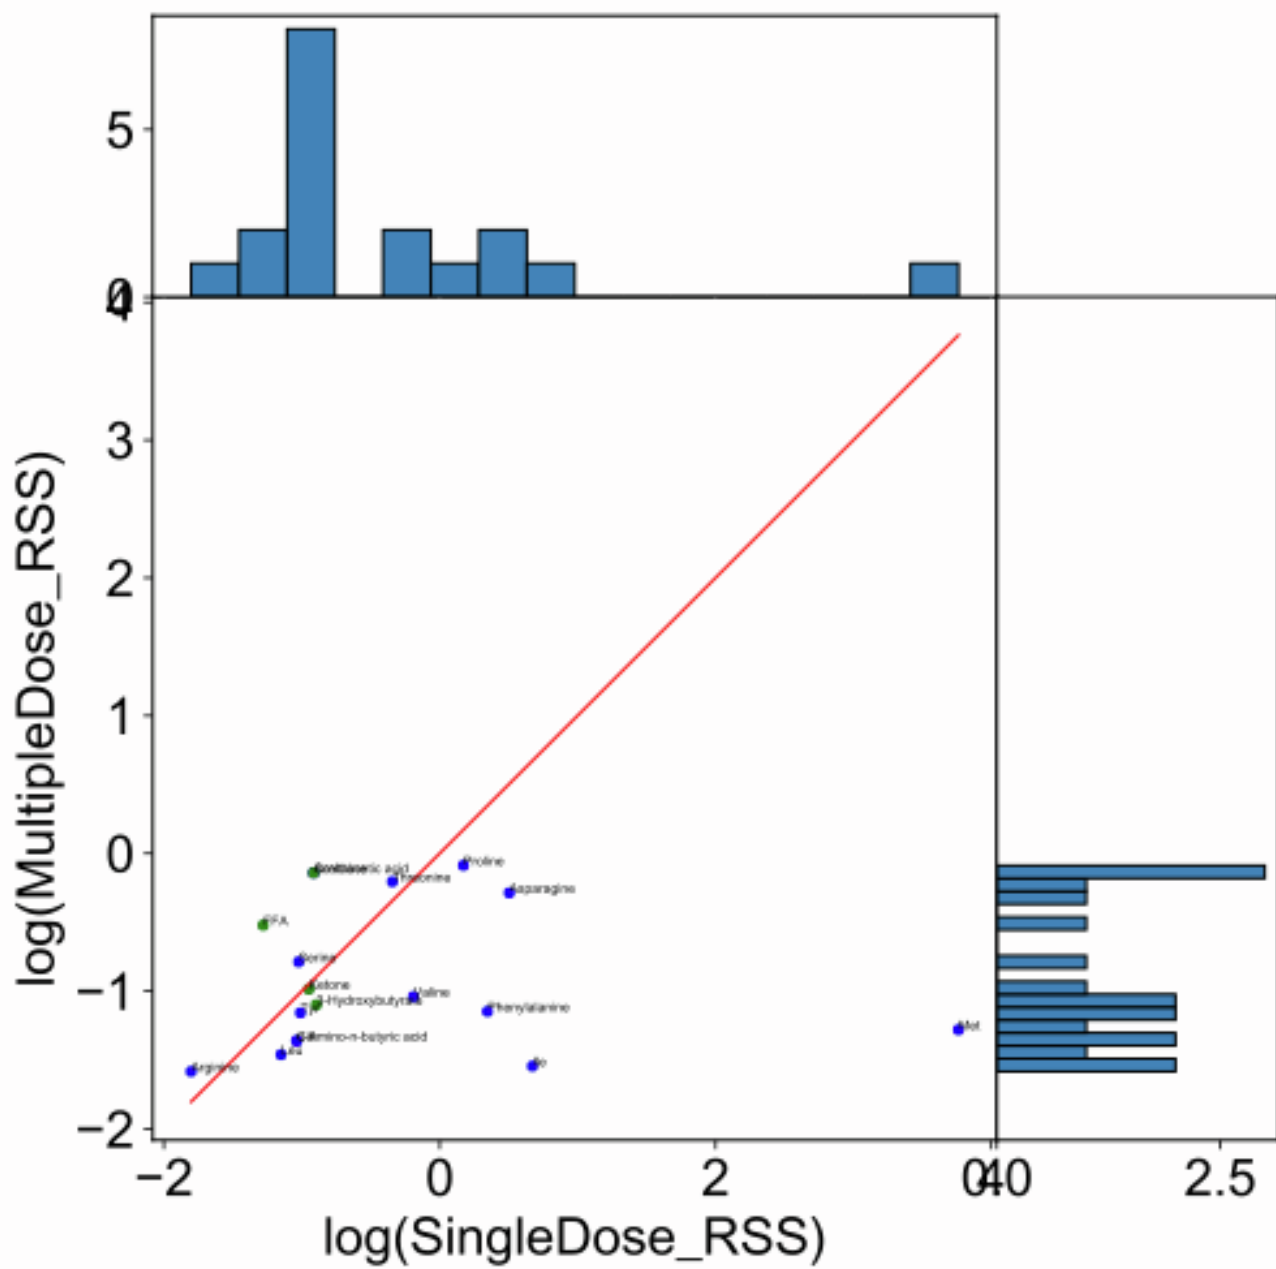

**Figure. S11 Influence of learning data on prediction. Related to Figure 1.**

The rss between simulations with parameters estimated from experimental data for 75 g, 50 g, and 25 g bolus ingestion and 2 h-continuous ingestion (all experiments, y axis) and 75 g bolus ingestion only (75 g bolus only, x axis), and experimental values for all metabolites. The red line indicates  $y=x$ . The dot's colors correspond to the metabolic group (blue: amino acids, green: lipids).

| Metabolites                    | Model #<br>(Population-averaged) | Subject #1 | Subject #2 | Subject #3 |
|--------------------------------|----------------------------------|------------|------------|------------|
| Ornithine                      | Model #1                         | Model #3   | Model #8   | Model #5   |
| Tyrosine                       | Model #1                         | Model #8   | Model #3   | Model #1   |
| 3-Hydroxybutyrate              | Model #3                         | Model #3   | Model #3   | Model #3   |
| Free fatty acid                | Model #3                         | Model #3   | Model #3   | Model #3   |
| Acetoacetic acid               | Model #3                         | Model #3   | Model #3   | Model #3   |
| Total ketone body              | Model #3                         | Model #3   | Model #3   | Model #3   |
| Arginine                       | Model #4                         | Model #4   | Model #5   | Model #1   |
| Proline                        | Model #4                         | Model #4   | Model #5   | Model #4   |
| Isoleucine                     | Model #5                         | Model #8   | Model #5   | Model #5   |
| Leucine                        | Model #5                         | Model #8   | Model #5   | Model #5   |
| Phenylalanine                  | Model #5                         | Model #4   | Model #5   | Model #1   |
| Valine                         | Model #5                         | Model #5   | Model #5   | Model #5   |
| $\alpha$ -Amino-n-butyric acid | Model #5                         | Model #3   | Model #8   | Model #3   |
| Asparagine                     | Model #8                         | Model #8   | Model #5   | Model #5   |
| Citrulline                     | Model #8                         | Model #1   | Model #8   | Model #8   |
| Methionine                     | Model #8                         | Model #4   | Model #3   | Model #8   |
| Serine                         | Model #8                         | Model #4   | Model #8   | Model #1   |
| Threonine                      | Model #8                         | Model #4   | Model #5   | Model #8   |



**Figure. S12 The selected for each subject. Related to Figure 1.**

Metabolites, numbers of selected models, model structures selected for each subject.

### Ornithine (Model #1)

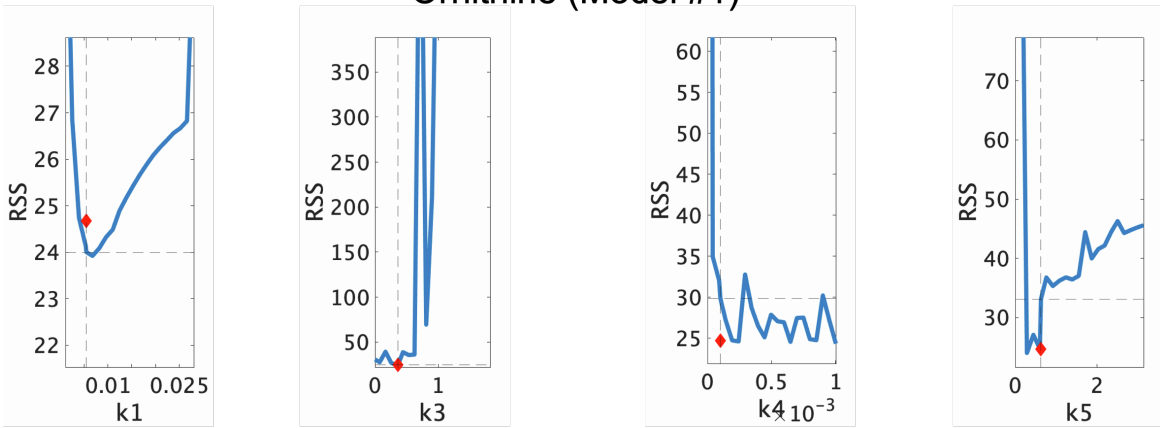

### Tyrosine (Model #1)

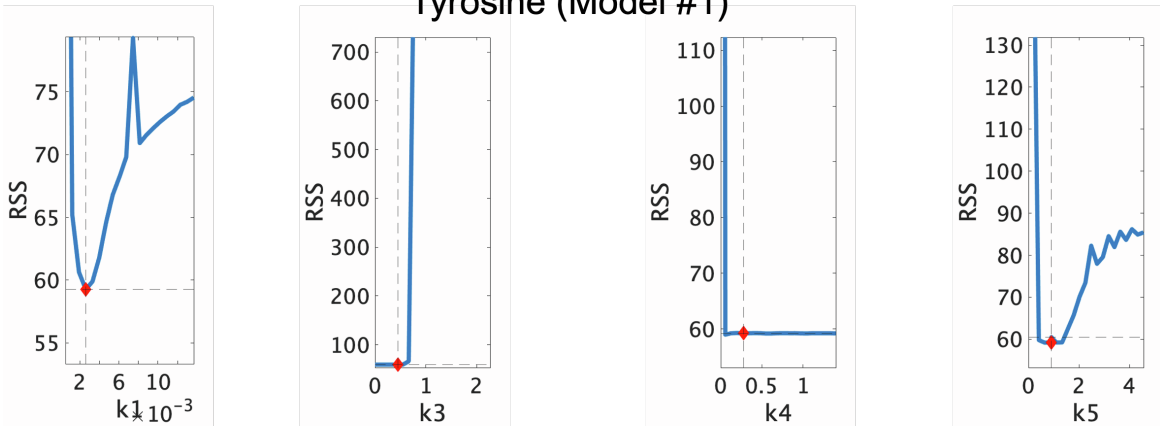

### 3-Hydroxybutyrate (Model #3)

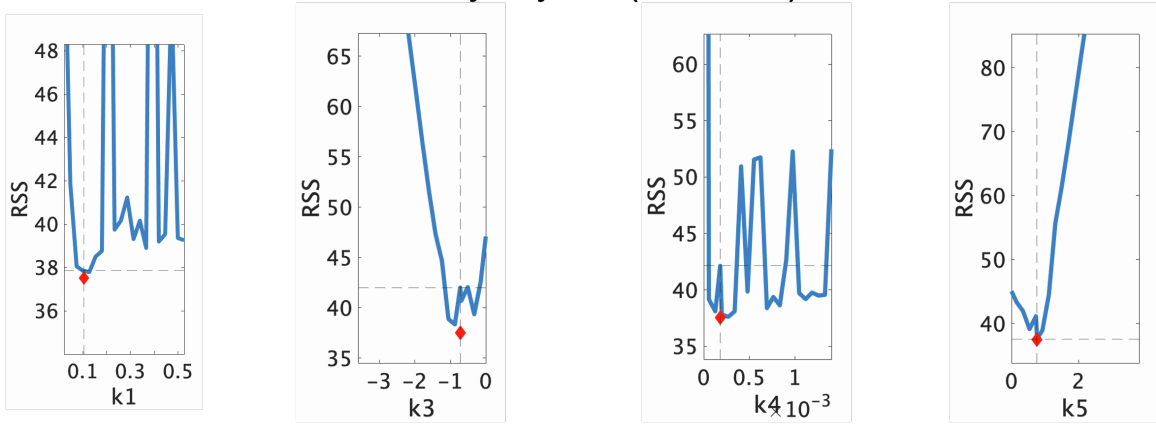

### Free fatty acid (Model #3)

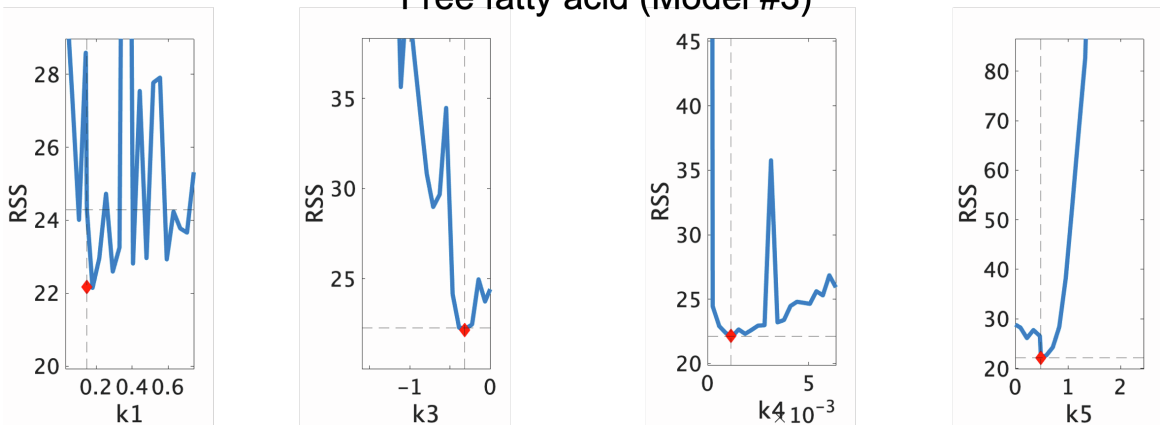

### Acetoacetic acid (Model #3)

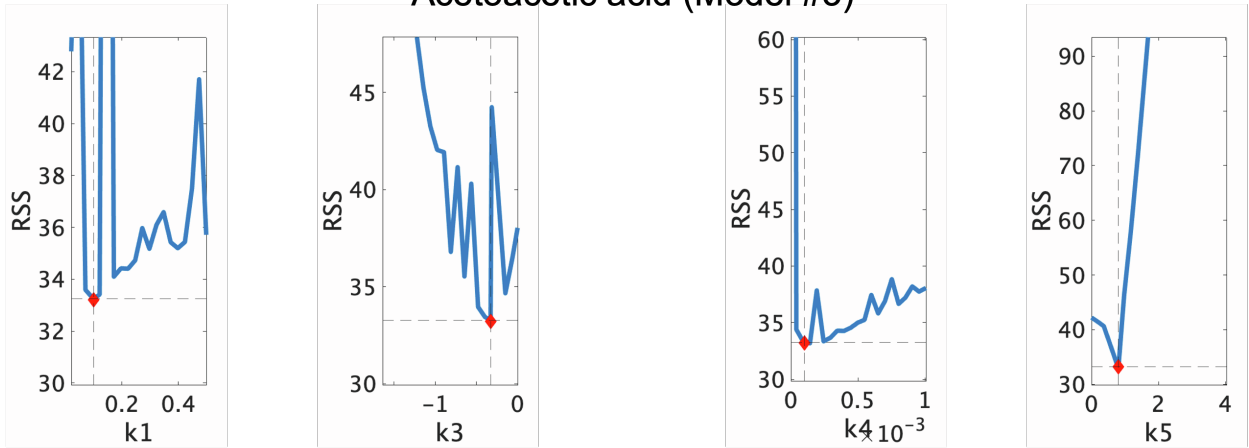

### Total ketone body (Model #3)

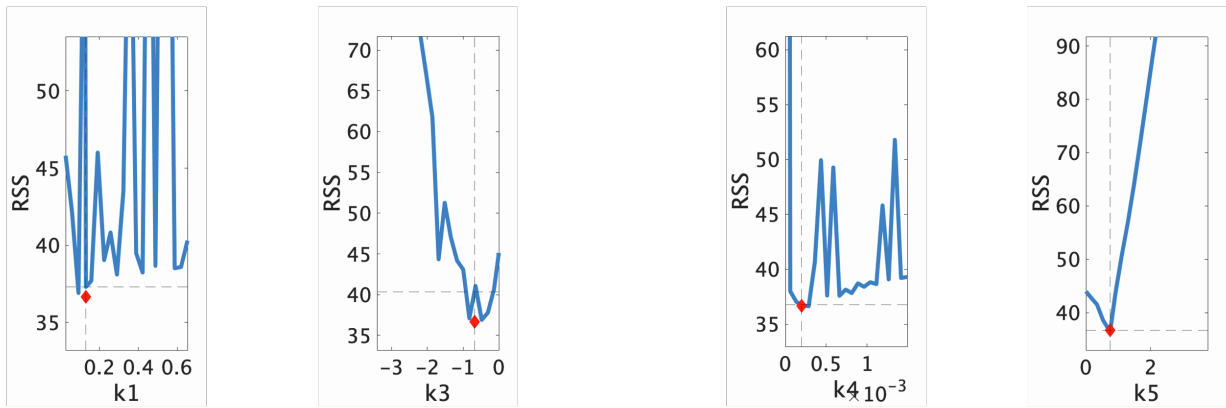

### Arginine (Model #4)

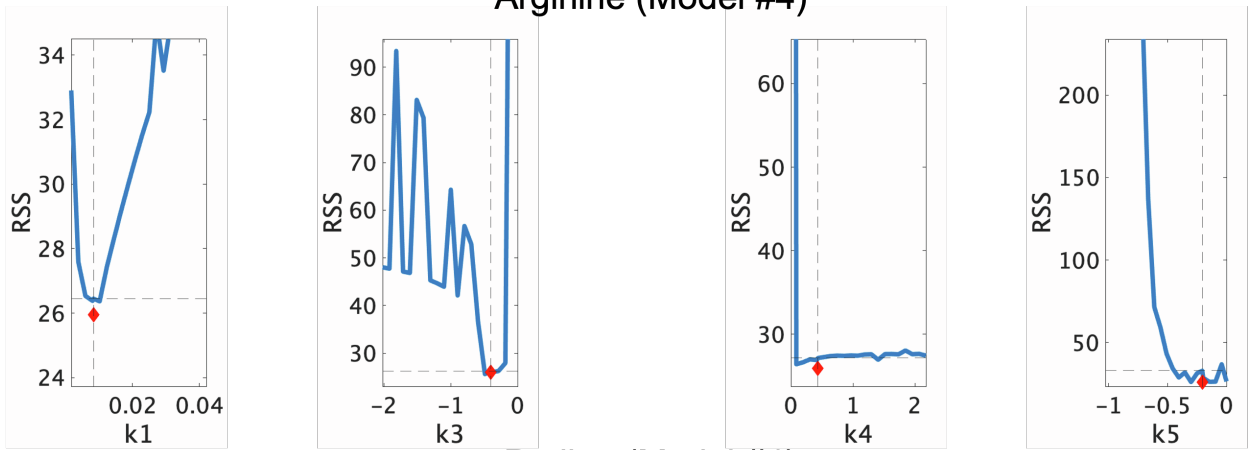

### Proline (Model #4)

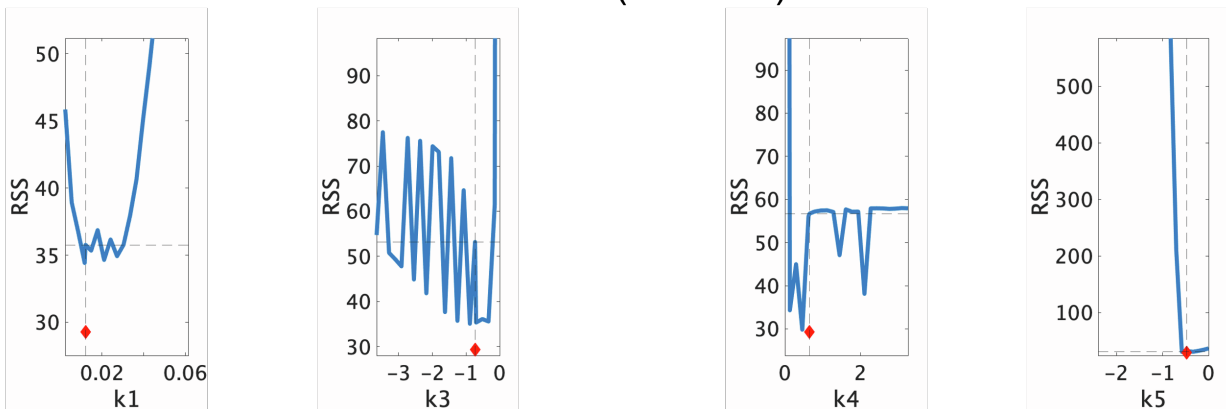

### Isoleucine (Model #5)

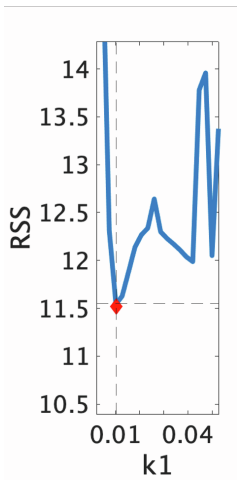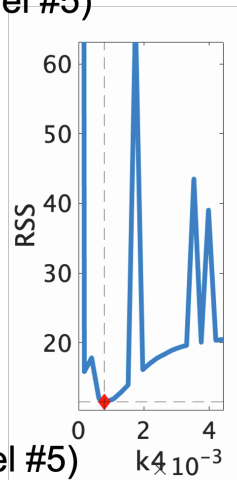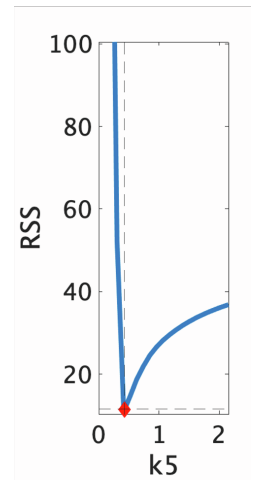

### Leucine (Model #5)

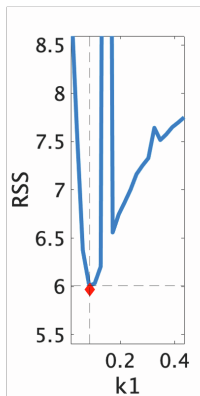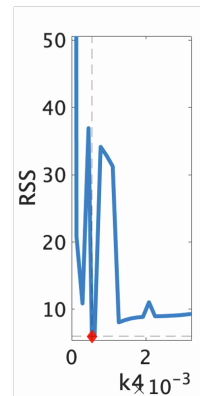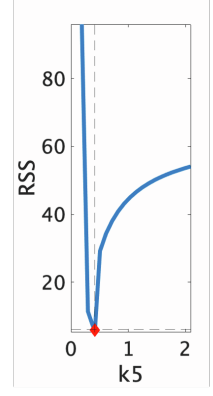

### Phenylalanine (Model #5)

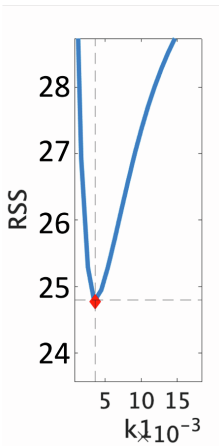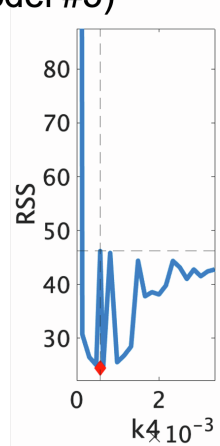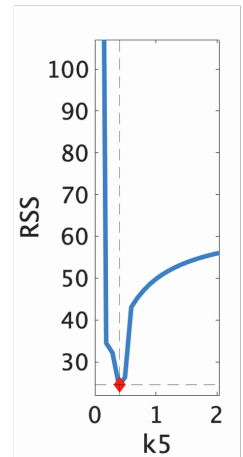

### Valine (Model #5)

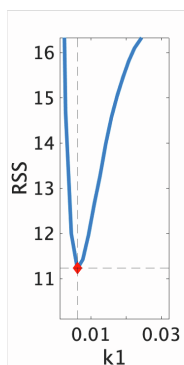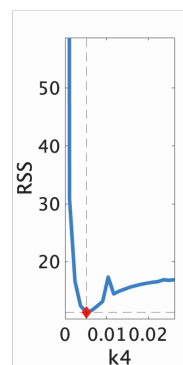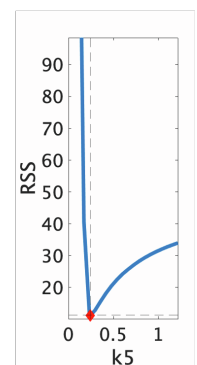

$\alpha$ -Amino-n-butyric acid (Model #5)

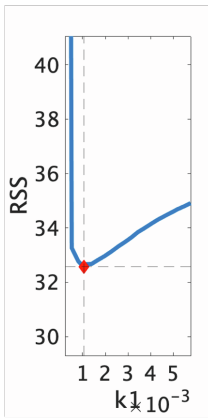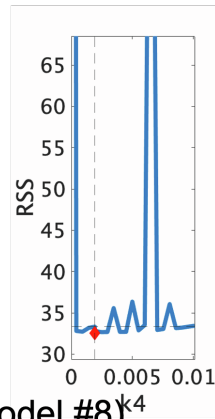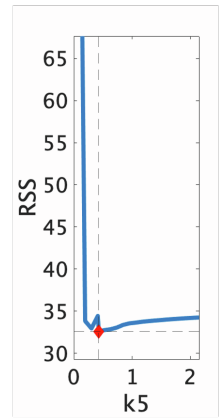

Asparagine (Model #8)

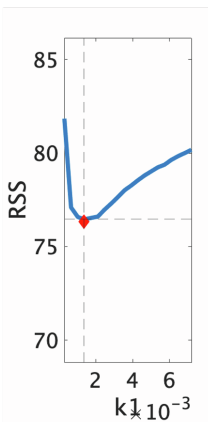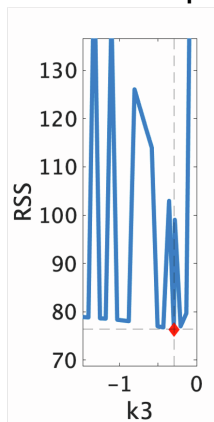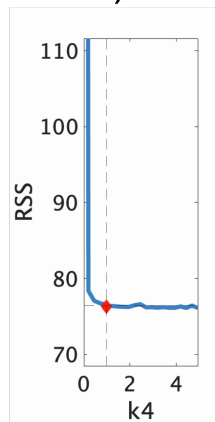

Citrulline (Model #8)

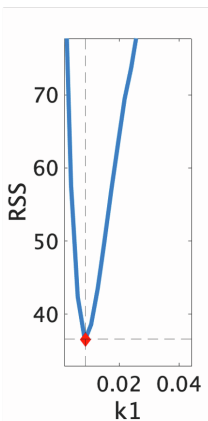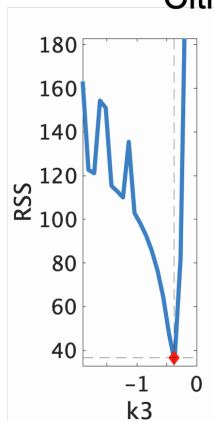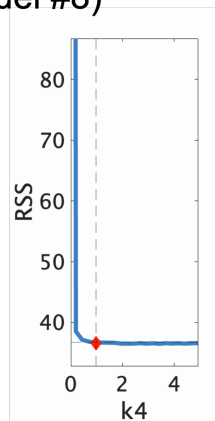

Methionine (Model #8)

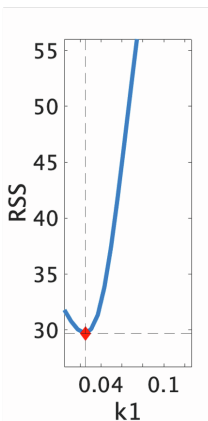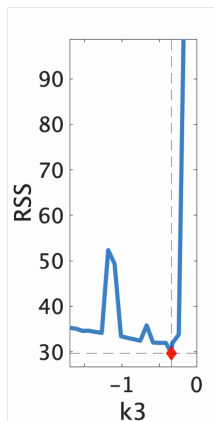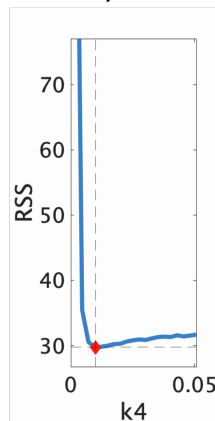

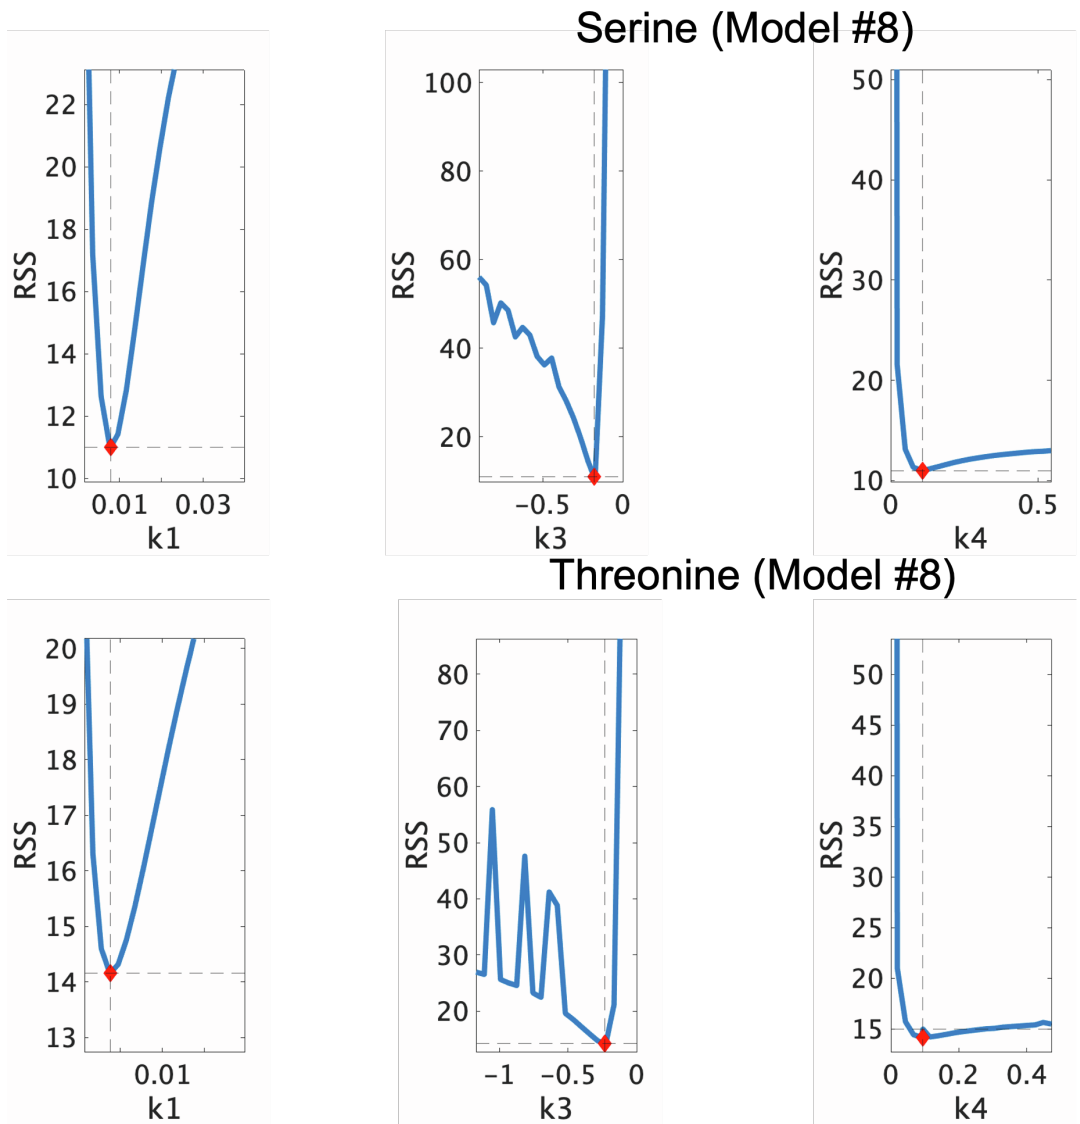

**Figure. S13 Identifiability of the parameters in the model structures selected for each metabolite. Related to Figure 1 and Figure 2.**

The red star indicates the RSS of the model fitted using the optimal parameter values estimated from the data, and the blue line indicates to the RSS when other parameter values are re-estimated after iterative adjustment of the parameter values. The dashed line represents the RSS when re-estimated using the same values as the optimal parameter values. Parentheses denotes the selected model.

3-Hdroxybutyrate (Model #3)

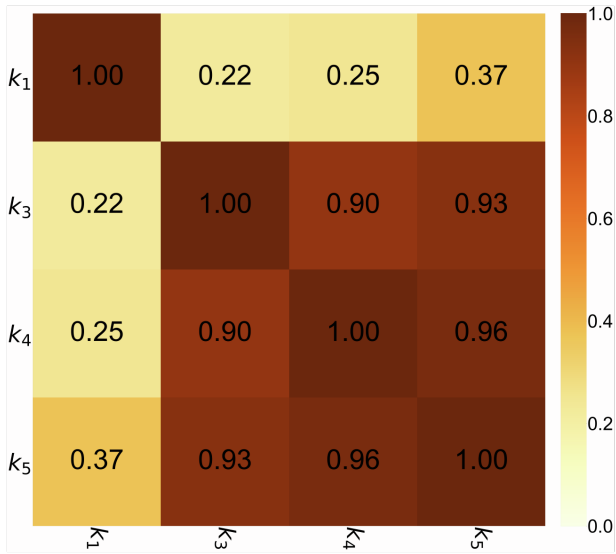

Acetoacetic acid (Model #3)

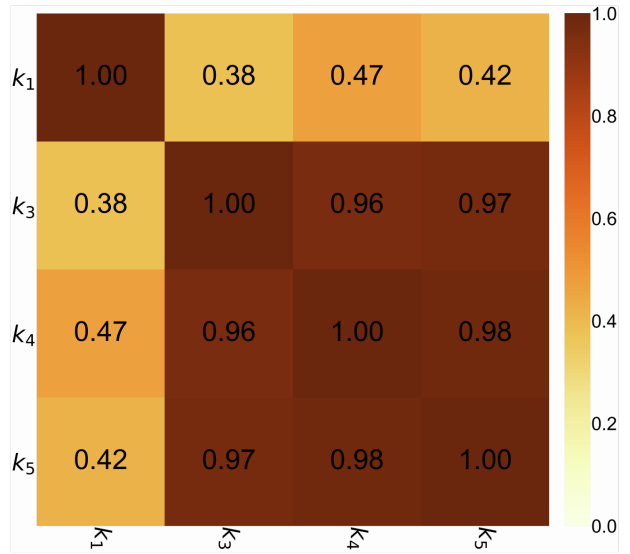

Free fatty acid (Model #3)

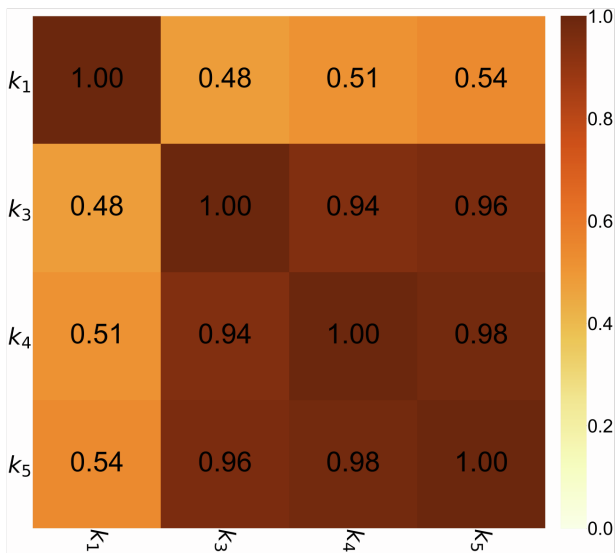

Total ketone body (Model #3)

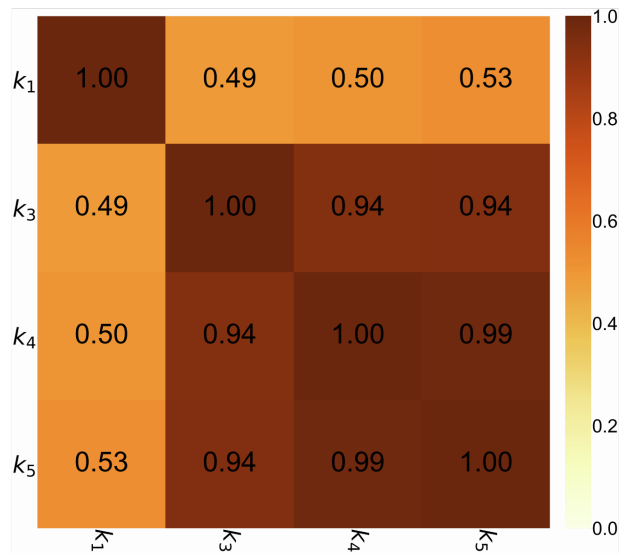

**Figure. S14 Correlation among the parameters for lipids. Related to Figure 1 and Figure 2.**

Correlation among the estimate parameters for selected model for lipids. The darker the color, the higher the correlation.



### 3-Hdroxybutyrate (Model #3)

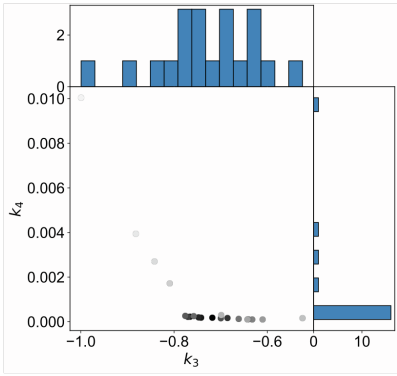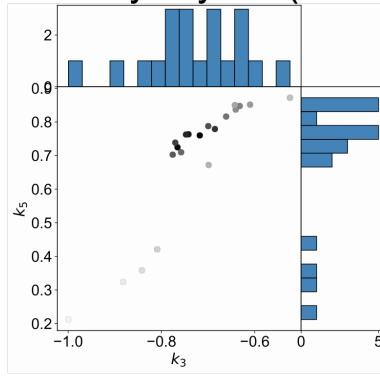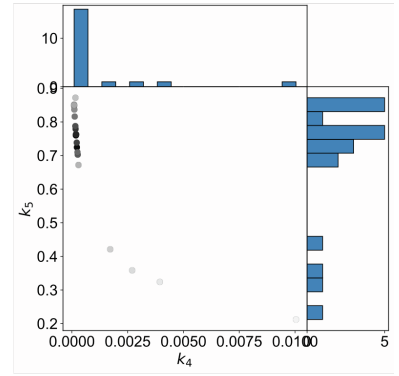

### Acetoacetic acid (Model #3)

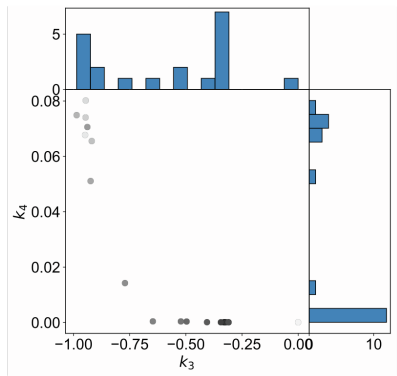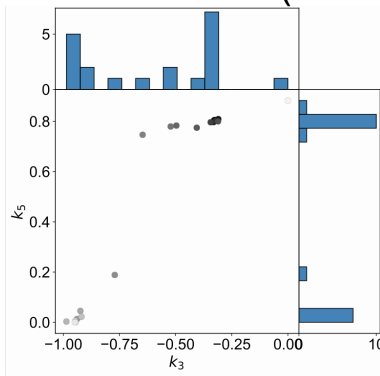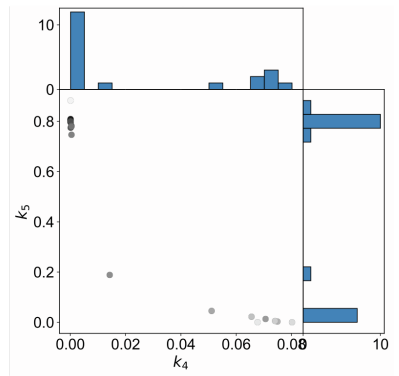

### Free fatty acid (Model #3)

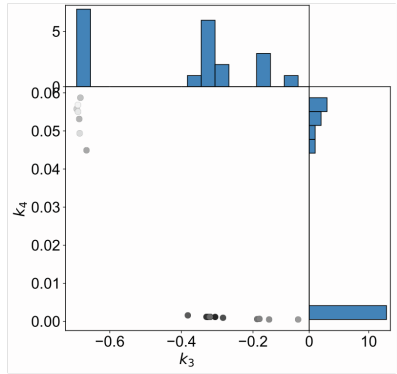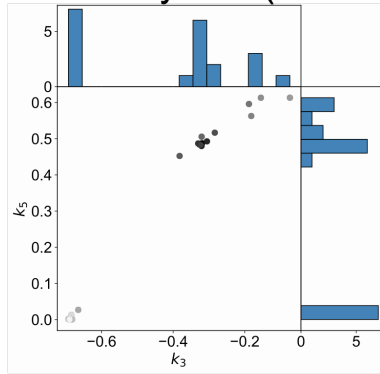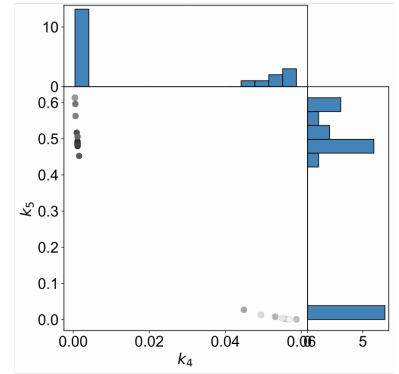

### Total ketone body (Model #3)

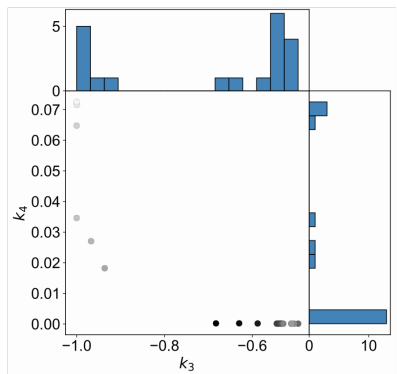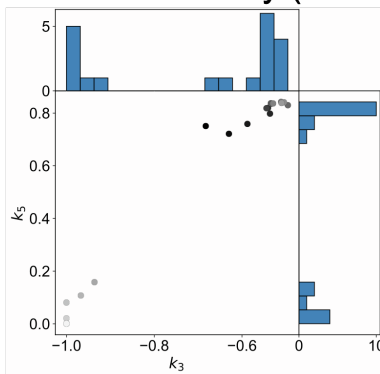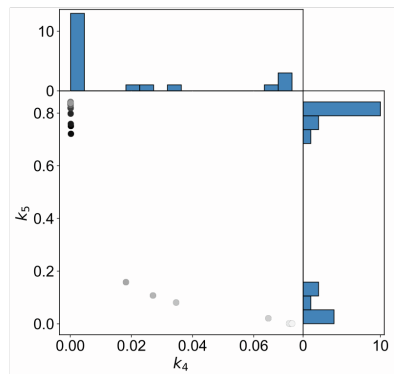

**Figure. S15 Distribution of highly correlated parameter pairs for lipids. Related to Figure 1**

**and Figure 2.**

The darker the color of the dots, the lower the RSS.
